# Supplementary material for: Enhancing the utility of 1JCH coupling constants in structural studies through optimized DFT analysis
Source: Royal Society of Chemistry journal article supplement (doi:10.1039/c9cc02469g), 2019-01-01
Supplement: c9cc02469g1.pdf [file c9cc02469g1.pdf]

## Supporting Information

### **Enhancing the Utility of $^1J_{\text{CH}}$ Couplings Constants in Structural Studies Through Optimized DFT Analysis**

*Alexei V. Buevich, \* Josep Saurí, Teodor Parella, Nunziatina De Tommasi, Giuseppe Bifulco, R. Thomas Williamson, and Gary E. Martin*

## Table of Contents

|                                                                                                                                                                                                                                                                                           | Pages   |
|-------------------------------------------------------------------------------------------------------------------------------------------------------------------------------------------------------------------------------------------------------------------------------------------|---------|
| Computational Methods.....                                                                                                                                                                                                                                                                | S4      |
| Table 1S. RMSD and differences between mean values of experimental and calculated $J$ -couplings ( $\Delta J$ ) for 22 $^1J_{CH}$ couplings of strychnine.....                                                                                                                            | S5      |
| Figure 1S. RMSD of 22 $^1J_{CH}$ couplings of strychnine calculated in two approximations, mixed (blue) and spinspace (red), with 36 different methods.....                                                                                                                               | S6      |
| Table 2S. $^1J_{CH}$ Couplings, RMSD and differences between mean values of experimental and calculated $J$ -couplings ( $\Delta J$ ) for 22 $^1J_{CH}$ couplings of strychnine .....                                                                                                     | S7-S15  |
| Figure 2S. Summary of Principal Component Analysis (PCA) of 62 combination of functional/basis sets used to calculate 22 $^1J_{CH}$ couplings of strychnine and the set of experimental $J$ -couplings...S16                                                                              | S16     |
| Figure 3S. Score plots of two new vectors, t1 vs t2, describing 99.1% variations among 62 different combination of functional/basis sets used to calculate 22 $^1J_{CH}$ couplings of strychnine and the set of experimental $^1J_{CH}$ couplings.....                                    | S17     |
| Figure 4S. Loading plots of p1 vs p2 showing which $J$ -couplings describe the similarities and dissimilarities between different combinations of functional/basis sets used to calculate 22 $^1J_{CH}$ couplings of strychnine and the set of experimental $^1J_{CH}$ couplings.....     | S18     |
| Figure 5S. RMSD of $^1J_{CH}$ couplings of strychnine (B3LYP/6-31G(d,p)(mixed)) as a function of the C-H distance deviations ( $\Delta r(C,H)$ ) from the C-H distances calculated at the B3LYP/6-31G(d) level of theory.....                                                             | S19     |
| Figure 6S. RMSD of $^1J_{CH}$ couplings of strychnine (B3LYP/6-31G(d,p)(mixed)) as a function of the average C-H distance deviations ( $\Delta r(C,H)$ ) from the C-H distances calculated at the B3LYP/6-31G(d) level of theory for 16 different geometry optimization models.....       | S21     |
| Table 3S. RMSD and differences between mean values of experimental and calculated $J$ -couplings ( $\Delta J$ ) for 22 $^1J_{CH}$ couplings of strychnine calculated at B3LYP/6-31G(d,p) and B3LYP/TZVP levels for strychnine geometries optimized by 16 different methods.....           | S21     |
| Table 4S. $^1J_{CH}$ Couplings, RMSD and differences between mean values of experimental and calculated $J$ -couplings ( $\Delta J$ ) for 22 $^1J_{CH}$ couplings of strychnine calculated at the B3LYP/6-31G(d,p) level for strychnine geometries optimized by 15 different methods..... | S22-S23 |
| Table 5S. Experimental and DFT calculated 119 $^1J_{CH}$ couplings for 62 compounds.....                                                                                                                                                                                                  | S24     |
| Table 6S. DFT calculated $^1J_{CH}$ coupling in acetylene using 18 x 18 combinations of geometry optimization and $J$ -coupling model chemistries.....                                                                                                                                    | S27     |
| Table 7S. Differences between experimental (249 Hz) and DFT calculated $^1J_{CH}$ coupling in acetylene using 18 x 18 combinations of geometry optimization and $J$ -coupling model chemistries.....                                                                                      | S27     |

|                                                                                                                                                                                                                                     |         |
|-------------------------------------------------------------------------------------------------------------------------------------------------------------------------------------------------------------------------------------|---------|
| Table 8S. Experimental, DFT calculated, and differences between experimental and calculated $^1J_{\text{CH}}$ couplings for seven alkynes.....                                                                                      | S28     |
| Figure 7S. Thirteen energetically feasible diastereomers of strychnine.....                                                                                                                                                         | S29     |
| Table 9S. $^1J_{\text{CH}}$ Couplings, RMSD and maximum $J$ -coupling deviations (max_d) for possible conformations ( <b>1a-1c</b> ) and diastereomers ( <b>2-13</b> ) of strychnine.....                                           | S30-S31 |
| Experimental details for <i>ent</i> -Trachyloban-6 $\beta$ ,18,19-trihydroxy-2-one ( <b>14</b> ).....                                                                                                                               | S32-S34 |
| Table 10S. $^1\text{H}$ and $^{13}\text{C}$ NMR data of compound <b>14</b> (CD <sub>3</sub> OD, 600 MHz, $\delta$ in ppm and $J$ in Hz in parenthesis).....                                                                         | S33     |
| Figure 8S. $J$ -resolved F1-iINEPT HSQC spectrum of <b>14</b> in DMSO- $d_6$ at 25 °C.....                                                                                                                                          | S34     |
| Figure 9S. Left: lowest energy conformation of <b>14</b> . Right: ChemDraw structure of <b>14</b> with most relevant ROE correlations.....                                                                                          | S35     |
| Figure 10S. ROESY spectrum of <b>14</b> in DMSO- $d_6$ at 25 °C.....                                                                                                                                                                | S35     |
| Table 11S. RMSD, max_d, correlation coefficients R and number of analyzed conformations for terpene <b>14</b> and its isomers <b>15-19</b> .....                                                                                    | S37     |
| Table 12S. $^1J_{\text{CH}}$ Couplings for the nine lowest energy conformations of <b>14</b> , conformational weights, averaged $^1J_{\text{CH}}$ couplings, RMSD and maximum $J$ -coupling deviation (max_d) for <b>14</b> .....   | S38     |
| Table 13S. $^1J_{\text{CH}}$ Couplings for the five lowest energy conformations of <b>15</b> , conformational weights, averaged $^1J_{\text{CH}}$ couplings, RMSD and maximum $J$ -coupling deviation (max_d) for <b>15</b> .....   | S39     |
| Table 14S. $^1J_{\text{CH}}$ Couplings for the eleven lowest energy conformations of <b>16</b> , conformational weights, averaged $^1J_{\text{CH}}$ couplings, RMSD and maximum $J$ -coupling deviation (max_d) for <b>16</b> ..... | S40     |
| Table 15S. $^1J_{\text{CH}}$ Couplings for the four lowest energy conformations of <b>17</b> , conformational weights, averaged $^1J_{\text{CH}}$ couplings, RMSD and maximum $J$ -coupling deviation (max_d) for <b>17</b> .....   | S41     |
| Table 16S. $^1J_{\text{CH}}$ couplings for the eight lowest energy conformations of <b>18</b> , conformational weights, averaged $^1J_{\text{CH}}$ couplings, RMSD and maximum $J$ -coupling deviation (max_d) for <b>18</b> .....  | S42     |
| Table 17S. $^1J_{\text{CH}}$ Couplings for the ten lowest energy conformations of <b>19</b> , conformational weights, averaged $^1J_{\text{CH}}$ couplings, RMSD and maximum $J$ -coupling deviation (max_d) for <b>19</b> .....    | S43     |
| Figure 11S. Overlay of minimum energy conformations of <b>14</b> (blue) and <b>19</b> (green).....                                                                                                                                  | S44     |
| References.....                                                                                                                                                                                                                     | S44     |

## Computational Methods

Force field calculations were done using Spartan '16<sup>[1]</sup> and PCModel V.10<sup>[2]</sup> software programs on a Windows7 PC equipped with an i5 Intel CPU@ 2.3 GHz, 8 GB RAM. Principal component analysis (PCA) was done using SIMCA-P v.10 program.<sup>[3]</sup> All QM calculations were done using Gaussian16 software package.<sup>[4]</sup> QM calculations were carried out either on Cray XC30 supercomputer or Linux cluster. From 12 to 16 processors and 25 GB of RAM were usually utilized for each calculation. Up to 80 simultaneous calculations were run depending of the available computational resources at the time. All basis sets for QM calculations were either standard ones from Gaussian16 or were downloaded from EMSL basis set exchange portal.<sup>[5]</sup> Computational time that was required for *J*-coupling calculations was dependent of the type of functional, basis set, method of calculation (mixed<sup>[6]</sup> vs spinspin) and the platform that was used for the calculation. The mixed algorithm was somewhat slower than spinspin, however in general the “mixed” results were of higher accuracy (see PCA analysis below) and the computational time for the most optimal combination of functional and basis set B3LYP/6-31G(d,p) for <sup>1</sup>J<sub>CH</sub> coupling calculations was still shorter than those of the majority of calculations that were performed using specialized basis sets for *J*-coupling calculations even with the spinspin algorithm. Here are examples of wall-clock times of *J*-coupling calculations for strychnine (C<sub>21</sub>H<sub>22</sub>N<sub>2</sub>O<sub>2</sub>, total number of *J*-couplings 1081) on Linux cluster (each calculation used up to 16 processors and 25 GB of RAM):

|                       |                    |                |
|-----------------------|--------------------|----------------|
| B3LYP/6-31G(d,p)      | 1.8 h (spinsspin)  | 2.0 h (mixed)  |
| B3LYP/TZVP            | 5.5 h (spinspin)   | 10.5 h (mixed) |
| B3LYP/aug-cc-pVTZ-J   | 294 h (spinspin)   | 485 h (mixed)  |
| pw91/aug-cc-pVTZ-J    | 20.2 h (spinspin)  | 36.5 h (mixed) |
| pbe/aug-cc-pVTZ-J     | 20.4 h (spinspin)  | 33.2 h (mixed) |
| B3LYP/6-31G-J         | 0.9 h (spinsspin)  |                |
| B3LYP/6-31+G(d)-J     | 5.2 h (spinsspin)  |                |
| B3LYP/6-311++G(d,p)-J | 17.2 h (spinsspin) |                |
| PBE/ccJ-pVDZ          | 23.0 h (spinspin)  |                |
| B3LYP/pcJ-0           | 0.5 h (spinsspin)  |                |
| B3LYP/pcJ-1           | 4.9 h (spinsspin)  |                |
| B3LYP/pcJ-2           | 80.7 h (spinsspin) |                |
| B3LYP/epr-III         | 80.2 h (spinsspin) |                |

Root mean square deviations (RMSD), maximum *J*-coupling deviations (max\_d), differences between mean values ( $\Delta$ ), and correlation coefficients (R) were used to compare calculated *J*-couplings with experimental. It is noteworthy, that in the process of comparison of the calculated with experimental *J*-couplings, no assignments of methylene protons were assumed. The assignments of the methylene protons would require utilization of additional spectroscopic data, such as proton-proton couplings, NOEs, chemical shifts. Herewith we relied only on the size of the <sup>1</sup>J<sub>CH</sub> couplings, which is an unbiased, independent, and more challenging test compared with an analysis utilizing assigned protons. The only condition that we applied here was that for the pair of calculated couplings for methylene protons, we chose the assignment which provided the lowest RMSD. For example, if the set of two calculated couplings were 135 and 140 Hz and the experimental values were 141 and 134 Hz, we would correspondingly reverse assignments of the protons so the contributions to the RMSD value would be proportional to the (140-141) and (135-134) differences (total=2 Hz), instead of (141-135) and (140-134) (total=12 Hz). This procedure was done for each methylene pair in each trial structure.

**Table 1S.** RMSD and differences between mean values of experimental and calculated  $J$ -couplings ( $\Delta J$ ) for 22  $^1J_{\text{CH}}$  couplings of strychnine.<sup>a</sup>

| Method                           | Mixed<br>RMSD, Hz | Mixed<br>$\Delta J$ , Hz <sup>b</sup> | Spinspin<br>RMSD, Hz | Spinspin<br>$\Delta J$ , Hz <sup>b</sup> |
|----------------------------------|-------------------|---------------------------------------|----------------------|------------------------------------------|
| B3LYP/6-31G                      | 6.71              | -6.40                                 | 23.73                | -21.35                                   |
| B3LYP/6-31G(d)                   | 3.81              | -3.41                                 | 12.56                | -1.69                                    |
| B3LYP/6-31+G(d)                  | 4.43              | -4.06                                 | 9.81                 | -2.73                                    |
| B3LYP/6-31G(d,p)                 | 3.24              | -2.77                                 | 12.82                | 0.91                                     |
| B3LYP/6-31+G(d,p)                | 3.91              | -3.49                                 | 10.08                | -0.78                                    |
| B3LYP/6-311G(d,p)                | 5.34              | -5.04                                 | 5.95                 | 5.30                                     |
| B3LYP/6-311+G(d,p)               | 5.74              | -5.43                                 | 6.73                 | 6.34                                     |
| B3LYP/6-311++G(d,p)              | 5.73              | -5.42                                 | 7.15                 | 6.78                                     |
| B3LYP/6-311++G(2d,p)             | 5.23              | -4.92                                 | 8.11                 | 7.71                                     |
| B3LYP/6-31G(d,3pd)               | 3.41              | -2.99                                 | 11.26                | 9.42                                     |
| B3LYP/6-311G(2d,2p)              | 4.60              | -4.27                                 | 12.26                | 11.89                                    |
| B3LYP/6-311G(3d,2p)              | 4.84              | -4.52                                 | 10.27                | 10.05                                    |
| B3LYP/6-311G(2df,2pd)            | 4.70              | -4.40                                 | 12.80                | 12.60                                    |
| B3LYP/6-311G(2df,3pd)            | 4.84              | -4.54                                 | 8.21                 | 7.98                                     |
| B3LYP/6-311G(3df,3pd)            | 4.78              | -4.47                                 | 8.32                 | 7.98                                     |
| B3LYP/aug-cc-pVTZ                | 5.61              | -5.34                                 | 14.67                | 13.99                                    |
| B3LYP/aug-cc-pVTZ-J              | 8.58              | -8.34                                 | 8.73                 | -8.50                                    |
| pw91/aug-cc-pVTZ-J               | 4.35              | 3.98                                  | 4.13                 | 3.71                                     |
| pbe/aug-cc-pVTZ-J                | 5.45              | 5.18                                  | 5.46                 | 5.18                                     |
| B3LYP/6-31G-J                    | --- <sup>c</sup>  | --- <sup>c</sup>                      | 12.51                | -12.32                                   |
| B3LYP/6-31G-J//B3LYP/6-31G-J     | --- <sup>c</sup>  | --- <sup>c</sup>                      | 13.41                | -13.22                                   |
| B3LYP/6-31+G(d)-J                | --- <sup>c</sup>  | --- <sup>c</sup>                      | 10.47                | -10.27                                   |
| B3LYP/6-311++G(d,p)-J            | --- <sup>c</sup>  | --- <sup>c</sup>                      | 10.19                | -10.00                                   |
| B3LYP/pcJ-0                      | 7.87              | 7.30                                  | 11.51                | 10.98                                    |
| B3LYP/pcJ-0//B3LYP/pcJ-0         | ---               | ---                                   | 10.48                | 9.00                                     |
| B3LYP/pcJ-1                      | 8.49              | -8.21                                 | 7.46                 | -7.22                                    |
| B3LYP/pcJ-1//B3LYP/pcJ-1         | ---               | ---                                   | 6.89                 | -6.65                                    |
| B3LYP/pcJ-2                      | --- <sup>c</sup>  | --- <sup>c</sup>                      | 7.24                 | -7.01                                    |
| B3LYP/pcJ-2_2006                 | --- <sup>c</sup>  | --- <sup>c</sup>                      | 9.34                 | -9.14                                    |
| B3LYP/epr-III                    | 7.29              | -7.07                                 | 4.49                 | -4.16                                    |
| B3LYP/epr-III//B3LYP/aug-cc-pVDZ | 7.62              | -7.37                                 | 4.82                 | -4.46                                    |
| pbe/NMR-DKH                      | 6.59              | 6.38                                  | 12.43                | 12.30                                    |
| pbe/ccJ-pVDZ                     | --- <sup>c</sup>  | --- <sup>c</sup>                      | 7.00                 | 6.77                                     |
| B3LYP/TZVP                       | 6.05              | -5.75                                 | 3.19                 | 2.27                                     |
| B3LYP/TZVP//B3LYP/TZVP           | ---               | ---                                   | 3.69                 | 3.03                                     |
| B3PW91/6-311++G(d,p)//           |                   |                                       |                      |                                          |
| B3PW91/6-311++G(d,p)             | 5.95              | 5.73                                  | 17.09                | 16.92                                    |

<sup>a</sup>  $J$ -couplings were calculated in two approximations, mixed and spinspin (see text for details). Unless otherwise stated the geometry of strychnine was optimized at the B3LYP/6-31G(d) level; <sup>b</sup>  $\Delta J = \overline{J^{exp}} - \overline{J^{calc}}$ ; <sup>c</sup> SFC convergence has failed

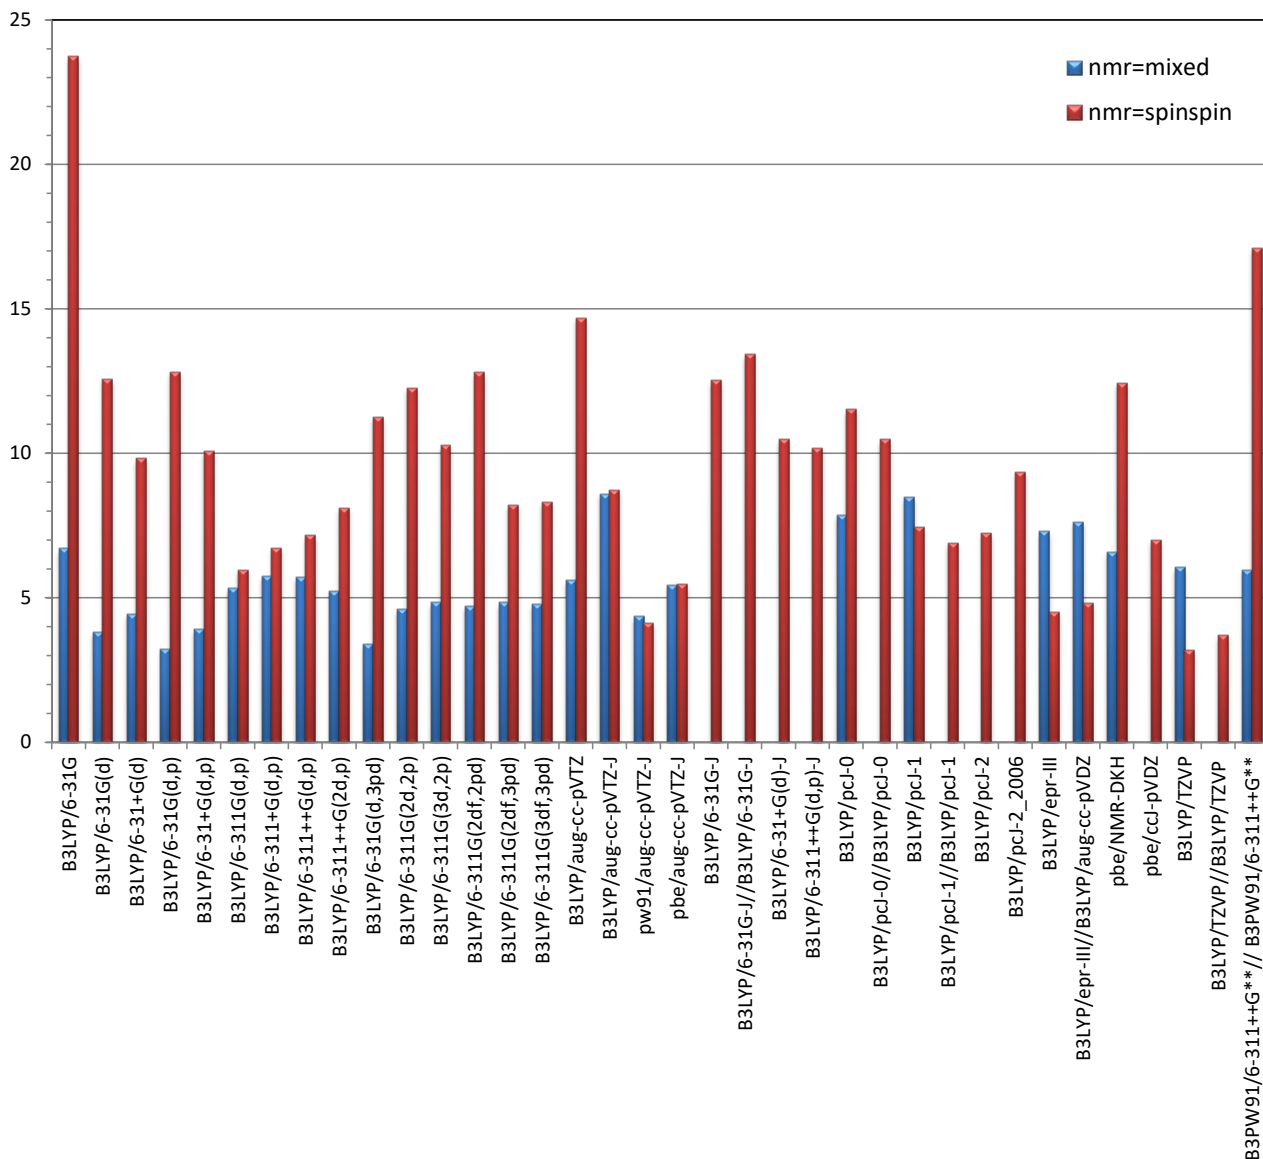

**Figure 1S.** RMSD of 22  $^1J_{\text{CH}}$  couplings of strychnine calculated in two approximations, mixed (blue) and spinspin (red), with 36 different methods. Unless otherwise stated the geometry of strychnine was optimized at the B3LYP/6-31G(d) level (see main text and Table 1S for more details).

**Table 2S.**  $^1J_{\text{CH}}$  Couplings (Hz), RMSD and differences between mean values of experimental and calculated  $J$ -couplings ( $\Delta J$ ) for 22  $^1J_{\text{CH}}$  couplings of strychnine.<sup>a</sup>

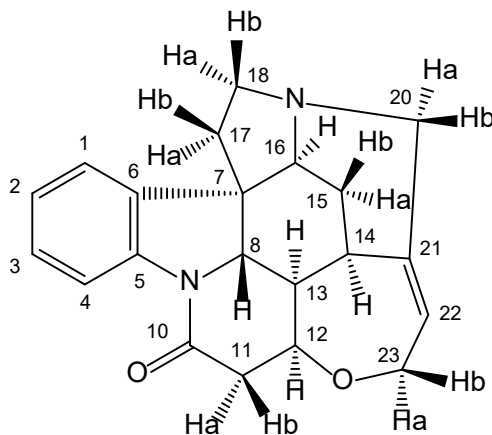

| Protons         | Exp.   | b3lyp/6-31g |          | b3lyp/6-31g(d) |          | b3lyp/6-31+g(d) |          | b3lyp/6-31g(d,p) |          |
|-----------------|--------|-------------|----------|----------------|----------|-----------------|----------|------------------|----------|
|                 |        | mixed       | spinspin | mixed          | spinspin | mixed           | spinspin | mixed            | spinspin |
| <b>H1</b>       | 158.36 | 163.2       | 158.9    | 161.1          | 135.9    | 160.6           | 146.1    | 159.4            | 132.8    |
| <b>H11a</b>     | 134.16 | 142.5       | 161.8    | 140.7          | 142.7    | 140.0           | 137.7    | 139.3            | 139.9    |
| <b>H11b</b>     | 124.74 | 134.3       | 160.3    | 130.7          | 142.5    | 130.0           | 139.2    | 129.4            | 140.4    |
| <b>H12</b>      | 149.12 | 152.0       | 171.6    | 150.3          | 152.5    | 150.0           | 151.4    | 148.7            | 150.1    |
| <b>H13</b>      | 124.2  | 131.4       | 161.5    | 128.7          | 143.9    | 128.3           | 144.4    | 127.8            | 141.7    |
| <b>H14</b>      | 129.82 | 136.0       | 160.6    | 133.9          | 141.5    | 133.5           | 139.8    | 132.9            | 138.4    |
| <b>H15a</b>     | 130.96 | 136.3       | 155.6    | 133.9          | 138.5    | 133.3           | 136.5    | 133.1            | 136.0    |
| <b>H15b</b>     | 129.94 | 135.9       | 158.6    | 133.7          | 141.1    | 133.1           | 136.5    | 132.7            | 139.1    |
| <b>H16</b>      | 146.36 | 154.4       | 174.2    | 151.6          | 153.1    | 151.2           | 153.7    | 150.3            | 150.1    |
| <b>H17a/b</b>   | 134.12 | 137.0       | 158.1    | 134.6          | 140.6    | 134.0           | 138.3    | 133.7            | 138.5    |
| <b>H17b/a</b>   | 134.12 | 141.0       | 156.3    | 138.6          | 138.4    | 138.0           | 138.9    | 137.7            | 135.5    |
| <b>H18a</b>     | 145.92 | 151.6       | 163.4    | 149.3          | 143.8    | 148.7           | 146.0    | 147.9            | 141.0    |
| <b>H18b</b>     | 130.24 | 135.1       | 153.9    | 133.0          | 138.0    | 132.4           | 140.8    | 132.4            | 136.6    |
| <b>H2</b>       | 159.8  | 167.1       | 162.2    | 165.0          | 138.5    | 164.4           | 143.7    | 163.2            | 135.4    |
| <b>H20a</b>     | 138.16 | 144.7       | 166.7    | 142.2          | 149.8    | 141.5           | 145.6    | 140.8            | 148.0    |
| <b>H20b</b>     | 137.86 | 143.0       | 161.1    | 141.0          | 142.7    | 140.4           | 140.4    | 139.9            | 139.7    |
| <b>H22</b>      | 158.4  | 165.7       | 169.5    | 163.4          | 145.5    | 162.9           | 153.1    | 161.5            | 142.3    |
| <b>H23a</b>     | 136.64 | 139.8       | 158.8    | 138.4          | 143.4    | 137.7           | 140.7    | 137.2            | 141.9    |
| <b>H23b</b>     | 144.42 | 151.8       | 166.0    | 148.9          | 144.1    | 148.2           | 148.6    | 147.1            | 141.3    |
| <b>H3</b>       | 158.6  | 165.7       | 161.6    | 163.7          | 138.0    | 163.2           | 143.5    | 161.8            | 135.0    |
| <b>H4</b>       | 168.26 | 179.5       | 173.1    | 177.0          | 148.8    | 176.4           | 155.8    | 175.5            | 145.5    |
| <b>H8</b>       | 144.94 | 152.2       | 175.1    | 148.7          | 153.2    | 148.4           | 158.5    | 147.9            | 150.2    |
| RMSD, Hz        |        | 6.71        | 23.73    | 3.81           | 12.56    | 4.43            | 9.81     | 3.24             | 12.82    |
| $\Delta J$ , Hz |        | -6.40       | -21.35   | -3.41          | -1.69    | -4.06           | -2.73    | -2.77            | 0.91     |

| Protons         | Exp.   | b3lyp/6-311g(2df,2pd) |          | b3lyp/6-311g(d,p) |          | b3lyp/6-311+g(d,p) |          | b3lyp/6-311++g(d,p) |          |
|-----------------|--------|-----------------------|----------|-------------------|----------|--------------------|----------|---------------------|----------|
|                 |        | mixed                 | spinspin | mixed             | spinspin | mixed              | spinspin | mixed               | spinspin |
| <b>H1</b>       | 158.36 | 161.2                 | 143.3    | 162.2             | 146.8    | 162.8              | 147.4    | 162.8               | 147.0    |
| <b>H11a</b>     | 134.16 | 140.7                 | 125.0    | 141.3             | 132.6    | 141.8              | 131.0    | 141.8               | 130.5    |
| <b>H11b</b>     | 124.74 | 130.8                 | 117.6    | 131.5             | 125.2    | 131.9              | 123.4    | 131.8               | 122.9    |
| <b>H12</b>      | 149.12 | 150.9                 | 131.6    | 151.2             | 141.4    | 151.9              | 140.4    | 151.9               | 139.9    |
| <b>H13</b>      | 124.2  | 129.3                 | 113.7    | 129.7             | 122.4    | 130.0              | 121.5    | 130.0               | 120.8    |
| <b>H14</b>      | 129.82 | 134.5                 | 117.0    | 135.0             | 126.2    | 135.3              | 125.3    | 135.3               | 124.9    |
| <b>H15a</b>     | 130.96 | 134.3                 | 119.2    | 134.9             | 126.7    | 135.1              | 125.3    | 135.0               | 125.1    |
| <b>H15b</b>     | 129.94 | 134.2                 | 119.1    | 134.7             | 126.8    | 134.9              | 125.2    | 134.9               | 124.9    |
| <b>H16</b>      | 146.36 | 152.0                 | 132.5    | 152.7             | 141.5    | 153.1              | 140.6    | 153.1               | 140.2    |
| <b>H17a/b</b>   | 134.12 | 135.2                 | 119.4    | 135.7             | 127.9    | 135.8              | 125.5    | 135.8               | 125.2    |
| <b>H17b/a</b>   | 134.12 | 139.0                 | 122.8    | 139.7             | 131.2    | 139.9              | 129.5    | 139.8               | 129.2    |
| <b>H18a</b>     | 145.92 | 149.7                 | 131.7    | 150.2             | 139.5    | 150.6              | 138.2    | 150.6               | 137.8    |
| <b>H18b</b>     | 130.24 | 133.9                 | 118.2    | 134.2             | 126.0    | 134.4              | 123.9    | 134.4               | 123.5    |
| <b>H2</b>       | 159.8  | 165.1                 | 147.0    | 166.1             | 151.1    | 166.9              | 151.1    | 166.8               | 150.4    |
| <b>H20a</b>     | 138.16 | 142.2                 | 125.0    | 142.8             | 134.2    | 143.2              | 132.1    | 143.2               | 131.8    |
| <b>H20b</b>     | 137.86 | 141.5                 | 125.1    | 142.0             | 132.6    | 142.2              | 130.3    | 142.2               | 130.2    |
| <b>H22</b>      | 158.4  | 163.8                 | 145.6    | 164.7             | 149.8    | 165.4              | 150.1    | 165.4               | 149.8    |
| <b>H23a</b>     | 136.64 | 138.9                 | 122.6    | 139.2             | 130.8    | 139.6              | 128.9    | 139.6               | 128.4    |
| <b>H23b</b>     | 144.42 | 148.8                 | 131.0    | 149.5             | 138.1    | 150.0              | 138.0    | 150.0               | 137.3    |
| <b>H3</b>       | 158.6  | 163.7                 | 146.0    | 164.7             | 149.8    | 165.6              | 149.9    | 165.5               | 149.2    |
| <b>H4</b>       | 168.26 | 177.1                 | 158.8    | 178.2             | 162.6    | 178.6              | 162.3    | 178.6               | 161.6    |
| <b>H8</b>       | 144.94 | 149.2                 | 129.6    | 149.8             | 139.4    | 150.0              | 139.8    | 150.0               | 139.2    |
| RMSD, Hz        |        | 4.70                  | 12.80    | 5.34              | 5.95     | 5.74               | 6.73     | 5.73                | 7.15     |
| $\Delta J$ , Hz |        | -4.40                 | 12.60    | -5.04             | 5.30     | -5.43              | 6.34     | -5.42               | 6.78     |



| Protons       | Exp.   | b3lyp/6-311++g(2d,p) |          | b3lyp/6-31g(d,3pd) |          | b3lyp/6-31+g(d,p) |          | b3lyp/6-311g(3d,2p) |          |
|---------------|--------|----------------------|----------|--------------------|----------|-------------------|----------|---------------------|----------|
|               |        | mixed                | spinspin | mixed              | spinspin | mixed             | spinspin | mixed               | spinspin |
| <b>H1</b>     | 158.36 | 162.2                | 146.2    | 159.6              | 137.5    | 160.6             | 143.1    | 161.7               | 144.4    |
| <b>H11a</b>   | 134.16 | 141.4                | 129.9    | 139.5              | 127.7    | 140.0             | 135.6    | 140.8               | 126.2    |
| <b>H11b</b>   | 124.74 | 131.2                | 123.0    | 129.5              | 124.2    | 130.0             | 138.2    | 130.8               | 118.7    |
| <b>H12</b>    | 149.12 | 151.6                | 138.6    | 149.1              | 138.4    | 150.0             | 150.0    | 150.9               | 136.5    |
| <b>H13</b>    | 124.2  | 129.5                | 120.6    | 128.1              | 126.8    | 128.3             | 143.2    | 129.3               | 117.9    |
| <b>H14</b>    | 129.82 | 134.8                | 123.4    | 133.2              | 127.4    | 133.5             | 138.0    | 134.5               | 122.4    |
| <b>H15a</b>   | 130.96 | 134.5                | 124.7    | 133.2              | 122.2    | 133.3             | 135.0    | 134.2               | 121.1    |
| <b>H15b</b>   | 129.94 | 134.5                | 124.6    | 132.9              | 128.6    | 133.1             | 135.4    | 134.2               | 122.3    |
| <b>H16</b>    | 146.36 | 152.5                | 138.5    | 150.6              | 138.7    | 151.2             | 151.8    | 152.1               | 137.5    |
| <b>H17a/b</b> | 134.12 | 135.4                | 124.8    | 133.9              | 126.1    | 134.0             | 137.0    | 135.1               | 122.3    |
| <b>H17b/a</b> | 134.12 | 139.3                | 128.3    | 137.8              | 124.8    | 138.0             | 136.7    | 139.0               | 125.5    |
| <b>H18a</b>   | 145.92 | 150.1                | 136.2    | 148.2              | 132.5    | 148.7             | 143.6    | 149.6               | 133.3    |
| <b>H18b</b>   | 130.24 | 134.0                | 123.3    | 132.6              | 122.9    | 132.4             | 140.2    | 133.8               | 118.2    |
| <b>H2</b>     | 159.8  | 166.2                | 148.9    | 163.5              | 141.2    | 164.4             | 140.7    | 165.7               | 149.1    |
| <b>H20a</b>   | 138.16 | 142.7                | 131.5    | 140.8              | 132.9    | 141.5             | 144.7    | 142.3               | 129.0    |
| <b>H20b</b>   | 137.86 | 141.8                | 129.2    | 140.1              | 126.8    | 140.4             | 138.1    | 141.4               | 126.4    |
| <b>H22</b>    | 158.4  | 164.7                | 149.0    | 161.7              | 141.1    | 162.9             | 149.9    | 164.2               | 147.4    |
| <b>H23a</b>   | 136.64 | 139.4                | 127.5    | 137.6              | 129.1    | 137.7             | 139.4    | 138.9               | 124.5    |
| <b>H23b</b>   | 144.42 | 149.4                | 135.6    | 147.2              | 134.1    | 148.2             | 146.3    | 148.8               | 132.3    |
| <b>H3</b>     | 158.6  | 164.9                | 147.9    | 162.1              | 140.1    | 163.2             | 140.6    | 164.3               | 147.9    |
| <b>H4</b>     | 168.26 | 177.9                | 160.8    | 175.5              | 150.6    | 176.4             | 152.5    | 177.6               | 159.6    |
| <b>H8</b>     | 144.94 | 149.5                | 137.1    | 148.1              | 138.1    | 148.4             | 156.3    | 149.3               | 135.4    |
| RMSD, Hz      |        | 5.23                 | 8.11     | 3.41               | 11.26    | 3.91              | 10.08    | 4.84                | 10.27    |
| $\Delta$ , Hz |        | -4.92                | 7.71     | -2.99              | 9.42     | -3.49             | -0.78    | -4.52               | 10.05    |

| Protons         | Exp.   | b3lyp/aug-cc-pVTZ   |          |                       |          |                       |          |                   |          |
|-----------------|--------|---------------------|----------|-----------------------|----------|-----------------------|----------|-------------------|----------|
|                 |        | b3lyp/6-311g(2d,2p) |          | b3lyp/6-311g(2df,3pd) |          | b3lyp/6-311g(3df,3pd) |          | b3lyp/aug-cc-pVTZ |          |
|                 |        | mixed               | spinspin | mixed                 | spinspin | mixed                 | spinspin | mixed             | spinspin |
| <b>H1</b>       | 158.36 | 161.3               | 141.4    | 161.4                 | 147.8    | 161.5                 | 149.5    | 162.5             | 151.7    |
| <b>H11a</b>     | 134.16 | 140.6               | 125.5    | 140.9                 | 129.1    | 140.8                 | 129.6    | 141.6             | 120.9    |
| <b>H11b</b>     | 124.74 | 130.6               | 120.4    | 130.9                 | 121.2    | 130.9                 | 120.1    | 131.7             | 112.0    |
| <b>H12</b>      | 149.12 | 150.7               | 133.7    | 151.0                 | 137.7    | 150.9                 | 136.9    | 152.1             | 129.1    |
| <b>H13</b>      | 124.2  | 129.2               | 116.8    | 129.4                 | 119.2    | 129.3                 | 116.4    | 129.9             | 108.0    |
| <b>H14</b>      | 129.82 | 134.3               | 118.8    | 134.6                 | 122.4    | 134.5                 | 122.2    | 135.3             | 115.2    |
| <b>H15a</b>     | 130.96 | 134.1               | 121.7    | 134.3                 | 122.8    | 134.2                 | 121.5    | 134.9             | 113.0    |
| <b>H15b</b>     | 129.94 | 134.0               | 121.0    | 134.3                 | 123.1    | 134.2                 | 121.8    | 135.0             | 114.3    |
| <b>H16</b>      | 146.36 | 151.9               | 133.7    | 152.3                 | 138.4    | 152.1                 | 137.7    | 153.0             | 131.8    |
| <b>H17a/b</b>   | 134.12 | 135.0               | 121.4    | 135.3                 | 123.8    | 135.2                 | 122.7    | 135.9             | 116.4    |
| <b>H17b/a</b>   | 134.12 | 138.8               | 123.6    | 139.1                 | 127.1    | 139.0                 | 127.0    | 139.7             | 119.9    |
| <b>H18a</b>     | 145.92 | 149.4               | 130.9    | 149.9                 | 136.2    | 149.7                 | 136.4    | 150.6             | 130.5    |
| <b>H18b</b>     | 130.24 | 133.6               | 120.5    | 133.9                 | 121.8    | 133.9                 | 120.2    | 134.6             | 114.1    |
| <b>H2</b>       | 159.8  | 165.1               | 144.9    | 165.4                 | 151.8    | 165.4                 | 154.7    | 166.6             | 152.7    |
| <b>H20a</b>     | 138.16 | 142.0               | 127.7    | 142.3                 | 129.9    | 142.3                 | 129.3    | 143.1             | 121.9    |
| <b>H20b</b>     | 137.86 | 141.2               | 125.9    | 141.6                 | 128.9    | 141.5                 | 128.7    | 142.3             | 117.5    |
| <b>H22</b>      | 158.4  | 163.8               | 143.8    | 164.0                 | 150.3    | 164.0                 | 152.0    | 165.1             | 150.6    |
| <b>H23a</b>     | 136.64 | 138.7               | 125.0    | 139.0                 | 127.0    | 139.0                 | 126.5    | 139.8             | 120.3    |
| <b>H23b</b>     | 144.42 | 148.5               | 129.3    | 149.0                 | 135.6    | 148.9                 | 136.3    | 149.8             | 126.7    |
| <b>H3</b>       | 158.6  | 163.7               | 143.9    | 164.0                 | 150.8    | 164.0                 | 153.3    | 165.3             | 150.6    |
| <b>H4</b>       | 168.26 | 177.2               | 156.7    | 177.2                 | 163.2    | 177.2                 | 165.6    | 178.3             | 164.5    |
| <b>H8</b>       | 144.94 | 149.1               | 131.7    | 149.3                 | 135.4    | 149.2                 | 134.8    | 149.9             | 129.7    |
| RMSD, Hz        |        | 4.60                | 12.26    | 4.84                  | 8.21     | 4.78                  | 8.32     | 5.61              | 14.67    |
| $\Delta J$ , Hz |        | -4.27               | 11.89    | -4.54                 | 7.98     | -4.47                 | 7.98     | -5.34             | 13.99    |

| Protons         | Exp.   | b3lyp/aug-cc-pVTZ-J |          | pw91/aug-cc-pVTZ-J |          | pbe/aug-cc-pVTZ-J |          | b3lyp/6-31G-J |
|-----------------|--------|---------------------|----------|--------------------|----------|-------------------|----------|---------------|
|                 |        | mixed               | spinspin | mixed              | spinspin | mixed             | spinspin | spinspin      |
| <b>H1</b>       | 158.36 | 166.0               | 166.2    | 152.8              | 153.3    | 151.5             | 151.7    | 169.4         |
| <b>H11a</b>     | 134.16 | 144.6               | 144.8    | 133.2              | 133.5    | 132.0             | 132.1    | 148.0         |
| <b>H11b</b>     | 124.74 | 134.3               | 134.3    | 122.2              | 122.3    | 121.0             | 120.9    | 139.9         |
| <b>H12</b>      | 149.12 | 155.1               | 155.2    | 142.3              | 142.5    | 141.1             | 141.0    | 158.2         |
| <b>H13</b>      | 124.2  | 132.4               | 132.5    | 120.8              | 121.0    | 119.7             | 119.6    | 137.0         |
| <b>H14</b>      | 129.82 | 137.8               | 138.1    | 126.7              | 126.9    | 125.6             | 125.6    | 141.7         |
| <b>H15a</b>     | 130.96 | 137.5               | 137.7    | 126.2              | 126.5    | 125.2             | 125.1    | 141.8         |
| <b>H15b</b>     | 129.94 | 137.7               | 137.7    | 126.2              | 126.3    | 125.1             | 125.0    | 141.4         |
| <b>H16</b>      | 146.36 | 156.0               | 156.3    | 144.2              | 144.5    | 143.0             | 143.0    | 160.8         |
| <b>H17a/b</b>   | 134.12 | 138.7               | 138.7    | 126.9              | 127.1    | 125.9             | 125.8    | 142.8         |
| <b>H17b/a</b>   | 134.12 | 142.4               | 142.7    | 131.2              | 131.4    | 130.1             | 130.0    | 146.6         |
| <b>H18a</b>     | 145.92 | 153.7               | 153.9    | 141.7              | 142.0    | 140.5             | 140.5    | 157.5         |
| <b>H18b</b>     | 130.24 | 137.1               | 137.4    | 124.9              | 125.2    | 123.9             | 123.9    | 140.6         |
| <b>H2</b>       | 159.8  | 170.3               | 170.4    | 157.0              | 157.5    | 155.6             | 155.8    | 173.4         |
| <b>H20a</b>     | 138.16 | 146.0               | 146.1    | 133.9              | 134.0    | 132.7             | 132.6    | 150.4         |
| <b>H20b</b>     | 137.86 | 145.0               | 145.4    | 133.3              | 133.5    | 132.1             | 132.2    | 148.6         |
| <b>H22</b>      | 158.4  | 168.6               | 168.8    | 154.6              | 154.9    | 153.1             | 153.2    | 172.4         |
| <b>H23a</b>     | 136.64 | 142.7               | 142.5    | 129.2              | 129.3    | 128.1             | 128.0    | 145.2         |
| <b>H23b</b>     | 144.42 | 152.9               | 153.2    | 140.3              | 140.7    | 139.1             | 139.2    | 157.7         |
| <b>H3</b>       | 158.6  | 169.0               | 169.0    | 155.9              | 156.3    | 154.5             | 154.7    | 172.0         |
| <b>H4</b>       | 168.26 | 182.2               | 182.3    | 167.8              | 168.2    | 166.3             | 166.4    | 186.2         |
| <b>H8</b>       | 144.94 | 152.7               | 152.9    | 140.3              | 140.4    | 139.1             | 139.0    | 158.6         |
| RMSD, Hz        |        | 8.58                | 8.73     | 4.35               | 4.13     | 5.45              | 5.46     | 12.51         |
| $\Delta J$ , Hz |        | -8.34               | -8.50    | 3.98               | 3.71     | 5.18              | 5.18     | -12.32        |

| Protons         | Exp.   | b3lyp/6-31G-J | b3lyp/6-31+G*-J | b3lyp/6-311++G**-J | b3lyp/pcJ-0 |          |
|-----------------|--------|---------------|-----------------|--------------------|-------------|----------|
|                 |        | //b3lyp-31G-J |                 | spinspin           | spinspin    | mixed    |
|                 |        | spinspin      | spinspin        | spinspin           | mixed       | spinspin |
| <b>H1</b>       | 158.36 | 169.7         | 167.7           | 167.5              | 151.6       | 149.5    |
| <b>H11a</b>     | 134.16 | 148.2         | 146.6           | 146.2              | 128.2       | 124.1    |
| <b>H11b</b>     | 124.74 | 140.5         | 136.5           | 136.2              | 122.1       | 118.6    |
| <b>H12</b>      | 149.12 | 161.1         | 156.9           | 156.7              | 136.0       | 131.6    |
| <b>H13</b>      | 124.2  | 137.4         | 134.5           | 134.3              | 119.1       | 115.5    |
| <b>H14</b>      | 129.82 | 141.9         | 139.8           | 139.6              | 124.3       | 119.9    |
| <b>H15a</b>     | 130.96 | 141.9         | 139.7           | 139.4              | 123.3       | 119.6    |
| <b>H15b</b>     | 129.94 | 141.5         | 139.5           | 139.2              | 123.2       | 119.0    |
| <b>H16</b>      | 146.36 | 163.3         | 158.2           | 157.9              | 139.9       | 134.9    |
| <b>H17a/b</b>   | 134.12 | 143.2         | 140.6           | 140.1              | 124.3       | 120.4    |
| <b>H17b/a</b>   | 134.12 | 146.7         | 144.6           | 144.3              | 127.5       | 124.2    |
| <b>H18a</b>     | 145.92 | 159.4         | 155.5           | 155.2              | 134.7       | 130.1    |
| <b>H18b</b>     | 130.24 | 141.0         | 138.8           | 138.8              | 121.1       | 117.8    |
| <b>H2</b>       | 159.8  | 173.2         | 171.7           | 171.6              | 154.0       | 151.5    |
| <b>H20a</b>     | 138.16 | 152.4         | 148.2           | 147.8              | 130.7       | 126.1    |
| <b>H20b</b>     | 137.86 | 148.7         | 146.9           | 146.7              | 128.8       | 124.7    |
| <b>H22</b>      | 158.4  | 171.8         | 170.4           | 170.2              | 152.0       | 149.0    |
| <b>H23a</b>     | 136.64 | 147.5         | 144.3           | 144.0              | 124.3       | 120.5    |
| <b>H23b</b>     | 144.42 | 160.3         | 155.2           | 154.7              | 133.6       | 128.6    |
| <b>H3</b>       | 158.6  | 172.5         | 170.4           | 170.3              | 152.5       | 150.0    |
| <b>H4</b>       | 168.26 | 186.4         | 184.1           | 183.7              | 167.9       | 166.0    |
| <b>H8</b>       | 144.94 | 161.3         | 155.2           | 154.8              | 139.5       | 136.1    |
| RMSD, Hz        |        | 13.41         | 10.47           | 10.19              | 7.87        | 11.51    |
| $\Delta J$ , Hz |        | -13.22        | -10.27          | -10.00             | 7.30        | 10.98    |

| Protons         | Exp.   | B3LYP/pcJ-0   | B3LYP/pcJ-1 |          | B3LYP/pcJ-1   | B3LYP/pcJ-2 | B3LYP/pcJ- |
|-----------------|--------|---------------|-------------|----------|---------------|-------------|------------|
|                 |        | //B3LYP/pcJ-0 | mixed       | spinspin | //B3LYP/pcJ-1 | spinspin    | spinspin   |
|                 |        | spinspin      |             |          | spinspin      | spinspin    | spinspin   |
| <b>H1</b>       | 158.36 | 149.4         | 166.2       | 163.9    | 163.1         | 164.4       | 166.7      |
| <b>H11a</b>     | 134.16 | 123.2         | 144.6       | 144.1    | 143.1         | 143.2       | 145.3      |
| <b>H11b</b>     | 124.74 | 118.1         | 134.3       | 134.4    | 133.6         | 133.2       | 135.1      |
| <b>H12</b>      | 149.12 | 133.1         | 153.8       | 153.0    | 152.2         | 153.7       | 156.0      |
| <b>H13</b>      | 124.2  | 117.8         | 132.0       | 132.0    | 131.5         | 131.4       | 133.3      |
| <b>H14</b>      | 129.82 | 119.1         | 137.8       | 137.1    | 136.5         | 136.8       | 138.8      |
| <b>H15a</b>     | 130.96 | 119.8         | 137.9       | 137.5    | 137.0         | 136.5       | 138.4      |
| <b>H15b</b>     | 129.94 | 118.7         | 137.5       | 137.3    | 136.6         | 136.5       | 138.5      |
| <b>H16</b>      | 146.36 | 137.9         | 155.7       | 154.3    | 154.2         | 154.7       | 157.0      |
| <b>H17a/b</b>   | 134.12 | 121.0         | 138.4       | 138.1    | 137.7         | 137.4       | 139.4      |
| <b>H17b/a</b>   | 134.12 | 125.1         | 142.7       | 142.2    | 141.8         | 141.3       | 143.3      |
| <b>H18a</b>     | 145.92 | 132.9         | 153.7       | 152.2    | 151.8         | 152.3       | 154.5      |
| <b>H18b</b>     | 130.24 | 118.9         | 136.5       | 136.2    | 135.9         | 136.0       | 138.0      |
| <b>H2</b>       | 159.8  | 151.5         | 170.4       | 168.2    | 167.4         | 168.5       | 170.9      |
| <b>H20a</b>     | 138.16 | 128.5         | 145.9       | 145.2    | 144.8         | 144.8       | 146.9      |
| <b>H20b</b>     | 137.86 | 125.5         | 144.9       | 144.2    | 143.6         | 143.8       | 145.9      |
| <b>H22</b>      | 158.4  | 148.1         | 168.3       | 166.1    | 165.0         | 167.0       | 169.3      |
| <b>H23a</b>     | 136.64 | 121.8         | 141.9       | 141.4    | 140.9         | 141.3       | 143.4      |
| <b>H23b</b>     | 144.42 | 131.3         | 153.0       | 151.5    | 151.4         | 151.5       | 153.7      |
| <b>H3</b>       | 158.6  | 150.9         | 169.1       | 166.9    | 166.2         | 167.2       | 169.5      |
| <b>H4</b>       | 168.26 | 167.2         | 182.4       | 180.4    | 179.5         | 180.3       | 182.8      |
| <b>H8</b>       | 144.94 | 141.4         | 152.7       | 151.8    | 151.7         | 151.6       | 153.7      |
| RMSD, Hz        |        | 10.48         | 8.49        | 7.46     | 6.89          | 7.24        | 9.34       |
| $\Delta J$ , Hz |        | 9.00          | -8.21       | -7.22    | -6.65         | -7.01       | -9.14      |

| Protons         | Exp.   | b3lyp/tzvp |          | b3lyp/tzvp//b3lyp/tzvp | b3lyp/epr-III//b3lyp/aug-cc-pVDZ |          |
|-----------------|--------|------------|----------|------------------------|----------------------------------|----------|
|                 |        | mixed      | spinspin | spinspin               | mixed                            | spinspin |
| <b>H1</b>       | 158.36 | 163.2      | 155.3    | 154.2                  | 165.2                            | 162.1    |
| <b>H11a</b>     | 134.16 | 142.0      | 134.4    | 134.4                  | 144.3                            | 141.4    |
| <b>H11b</b>     | 124.74 | 132.2      | 123.6    | 122.1                  | 132.8                            | 130.1    |
| <b>H12</b>      | 149.12 | 152.1      | 143.8    | 143.3                  | 153.8                            | 150.8    |
| <b>H13</b>      | 124.2  | 130.3      | 122.4    | 121.3                  | 130.6                            | 128.0    |
| <b>H14</b>      | 129.82 | 135.6      | 128.1    | 127.1                  | 136.4                            | 133.8    |
| <b>H15a</b>     | 130.96 | 135.4      | 126.4    | 125.6                  | 136.5                            | 133.7    |
| <b>H15b</b>     | 129.94 | 135.2      | 126.9    | 126.2                  | 136.7                            | 134.0    |
| <b>H16</b>      | 146.36 | 153.5      | 145.8    | 145.4                  | 154.8                            | 151.8    |
| <b>H17a/b</b>   | 134.12 | 136.2      | 127.9    | 127.5                  | 138.0                            | 135.3    |
| <b>H17b/a</b>   | 134.12 | 140.2      | 131.8    | 131.2                  | 141.6                            | 138.8    |
| <b>H18a</b>     | 145.92 | 150.8      | 143.2    | 142.8                  | 152.8                            | 149.8    |
| <b>H18b</b>     | 130.24 | 134.7      | 126.2    | 125.7                  | 136.5                            | 133.7    |
| <b>H2</b>       | 159.8  | 167.2      | 160.2    | 159.0                  | 169.3                            | 166.1    |
| <b>H20a</b>     | 138.16 | 143.5      | 135.0    | 134.3                  | 145.5                            | 142.5    |
| <b>H20b</b>     | 137.86 | 142.5      | 134.0    | 133.3                  | 144.2                            | 141.3    |
| <b>H22</b>      | 158.4  | 165.5      | 157.8    | 156.8                  | 167.6                            | 164.4    |
| <b>H23a</b>     | 136.64 | 139.8      | 130.8    | 130.2                  | 142.2                            | 139.4    |
| <b>H23b</b>     | 144.42 | 150.2      | 142.4    | 142.1                  | 152.3                            | 149.3    |
| <b>H3</b>       | 158.6  | 165.9      | 158.9    | 158.0                  | 168.1                            | 165.0    |
| <b>H4</b>       | 168.26 | 179.1      | 171.6    | 170.0                  | 181.1                            | 177.8    |
| <b>H8</b>       | 144.94 | 150.5      | 142.6    | 141.9                  | 151.3                            | 148.3    |
| RMSD, Hz        |        | 6.05       | 3.19     | 3.69                   | 7.62                             | 4.82     |
| $\Delta J$ , Hz |        | -5.75      | 2.27     | 3.03                   | -7.37                            | -4.46    |

| Protons         | Exp.   | B3LYP/epr-III |          | pbe/NMR-DKH |          | pbe/ccJ-pVDZ | B3PW91/6-311++G(d,p)//<br>B3PW91/6-311++G(d,p) |          |
|-----------------|--------|---------------|----------|-------------|----------|--------------|------------------------------------------------|----------|
|                 |        | mixed         | spinspin | mixed       | spinspin | spinspin     | mixed                                          | spinspin |
| <b>H1</b>       | 158.36 | 164.4         | 161.3    | 150.3       | 143.3    | 149.2        | 151.2                                          | 136.6    |
| <b>H11a</b>     | 134.16 | 143.3         | 140.5    | 130.6       | 125.2    | 130.7        | 131.4                                          | 121.1    |
| <b>H11b</b>     | 124.74 | 133.2         | 130.6    | 119.9       | 115.2    | 120.1        | 119.7                                          | 111.9    |
| <b>H12</b>      | 149.12 | 153.8         | 150.8    | 139.8       | 133.7    | 138.7        | 140.2                                          | 129.3    |
| <b>H13</b>      | 124.2  | 131.5         | 128.9    | 118.8       | 114.0    | 118.9        | 119.4                                          | 111.0    |
| <b>H14</b>      | 129.82 | 136.8         | 134.2    | 124.5       | 119.3    | 124.3        | 124.6                                          | 115.1    |
| <b>H15a</b>     | 130.96 | 136.5         | 133.8    | 124.0       | 118.6    | 124.5        | 124.6                                          | 115.6    |
| <b>H15b</b>     | 129.94 | 136.6         | 133.9    | 124.0       | 118.7    | 124.2        | 124.5                                          | 115.3    |
| <b>H16</b>      | 146.36 | 154.7         | 151.7    | 141.8       | 135.9    | 140.8        | 141.8                                          | 129.9    |
| <b>H17a/b</b>   | 134.12 | 137.5         | 134.8    | 124.8       | 119.4    | 124.9        | 125.6                                          | 115.9    |
| <b>H17b/a</b>   | 134.12 | 141.4         | 138.6    | 128.8       | 123.3    | 129.1        | 129.5                                          | 119.8    |
| <b>H18a</b>     | 145.92 | 152.3         | 149.3    | 139.2       | 133.1    | 138.6        | 139.5                                          | 127.8    |
| <b>H18b</b>     | 130.24 | 136.2         | 133.4    | 122.7       | 117.2    | 122.6        | 123.7                                          | 113.7    |
| <b>H2</b>       | 159.8  | 168.5         | 165.4    | 154.4       | 147.2    | 153.2        | 154.9                                          | 139.8    |
| <b>H20a</b>     | 138.16 | 144.8         | 141.9    | 131.7       | 125.9    | 131.4        | 132.2                                          | 121.8    |
| <b>H20b</b>     | 137.86 | 143.9         | 141.1    | 130.7       | 124.8    | 130.7        | 131.2                                          | 120.2    |
| <b>H22</b>      | 158.4  | 167.0         | 163.8    | 151.9       | 144.7    | 150.6        | 153.6                                          | 139.1    |
| <b>H23a</b>     | 136.64 | 141.4         | 138.6    | 127.3       | 121.5    | 126.9        | 128.3                                          | 118.2    |
| <b>H23b</b>     | 144.42 | 151.6         | 148.6    | 137.8       | 131.7    | 137.1        | 138.7                                          | 127.0    |
| <b>H3</b>       | 158.6  | 167.1         | 164.0    | 153.3       | 146.1    | 152.1        | 153.8                                          | 138.8    |
| <b>H4</b>       | 168.26 | 180.3         | 176.9    | 164.8       | 157.5    | 164.3        | 165.8                                          | 150.2    |
| <b>H8</b>       | 144.94 | 151.6         | 148.6    | 137.9       | 132.1    | 137.4        | 138.4                                          | 128.6    |
| RMSD, Hz        |        | 7.29          | 4.49     | 6.59        | 12.43    | 7.00         | 5.95                                           | 17.09    |
| $\Delta J$ , Hz |        | -7.07         | -4.16    | 6.38        | 12.30    | 6.77         | 5.73                                           | 16.92    |

<sup>a</sup>  $J$ -couplings were calculated in two approximations, *mixed* and *spinspin* (see text for details). Unless otherwise stated the geometry of strychnine was optimized at the B3LYP/6-31G(d) level;

$$\Delta J = \overline{j^{exp}} - \overline{j^{calc}}$$

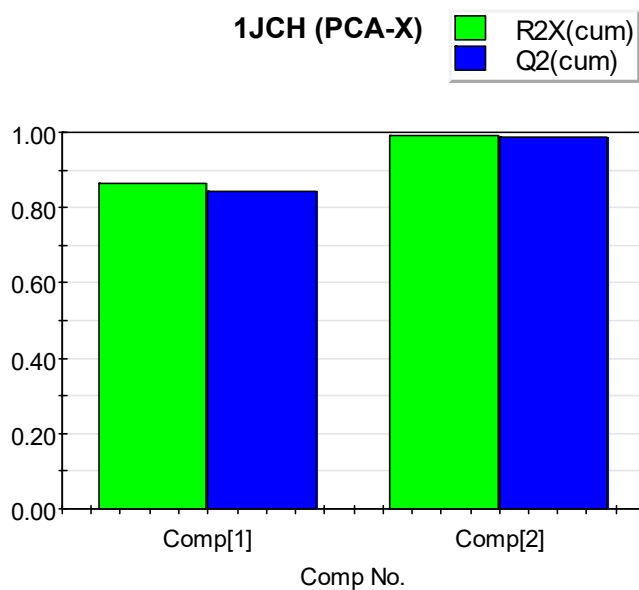

**Figure 2S.** Summary of Principal Component Analysis (PCA) of 62 combination of functional/basis sets used to calculate 22  $^1J_{\text{CH}}$  couplings of strychnine and the set of experimental  $J$ -couplings. Unless otherwise stated the 3D structure of strychnine was optimized at the B3LYP/6-31G(d) level. R2X(cum) is a fraction of the variation of the data explained after each component and Q2X(cum) is a cross-validated R2X(cum). The two-components RCA accounts for 99.1% of data variations (R2X(cum)).



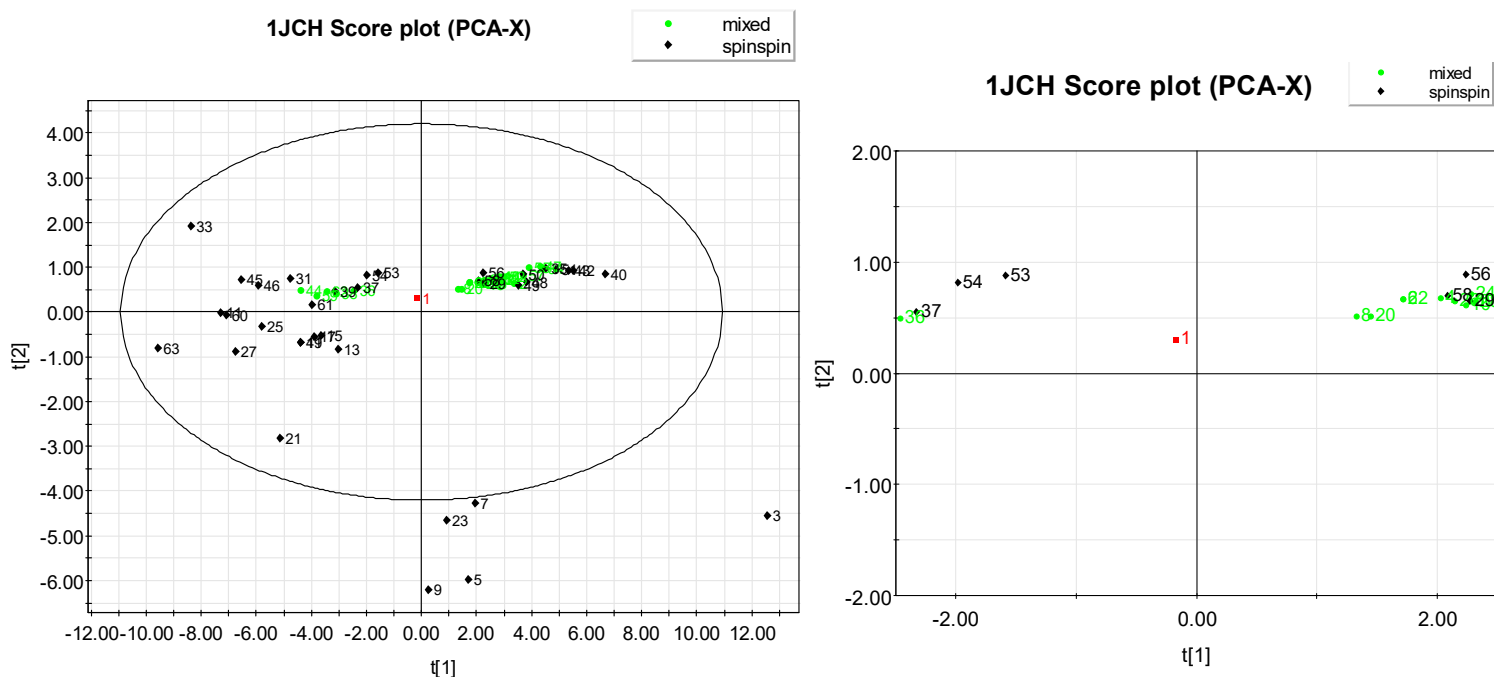

| Model                       | Model                              | Model                                             |
|-----------------------------|------------------------------------|---------------------------------------------------|
| 1 Experimental data         | 22 b3lyp/6-31+g(d,p)-m             | 43 b3lyp/6-311++g(d,p)-J-ss                       |
| 2 b3lyp/6-31g-m             | 23 b3lyp/6-31+g(d,p)-ss            | 44 b3lyp/pcJ-0-m                                  |
| 3 b3lyp/6-31g-ss            | 24 b3lyp/6-311g(3d,2p)-m           | 45 b3lyp/pcJ-0-ss                                 |
| 4 b3lyp/6-31g(d)-m          | 25 b3lyp/6-311g(3d,2p)-ss          | 46 b3lyp/pcJ-0//B3LYP/pcJ-0-ss                    |
| 5 b3lyp/6-31g(d)-ss         | 26 b3lyp/6-311g(2d,2p)-m           | 47 b3lyp/pcJ-1-m                                  |
| 6 b3lyp/6-31+g(d)-m         | 27 b3lyp/6-311g(2d,2p)-ss          | 48 b3lyp/pcJ-1-ss                                 |
| 7 b3lyp/6-31+g(d)-ss        | 28 b3lyp/6-311g(d,3pd)-m           | 49 b3lyp/pcJ-1//B3LYP/pcJ-1-ss                    |
| 8 b3lyp/6-31g(d,p)-m        | 29 b3lyp/6-311g(d,3pd)-ss          | 50 b3lyp/pcJ-2-ss                                 |
| 9 b3lyp/6-31g(d,p)-ss       | 30 b3lyp/6-31g(3df,3pd)-m          | 51 b3lyp/pcJ-2_2006-ss                            |
| 10 b3lyp/6-311g(2df,2pd)-m  | 31 b3lyp/6-31g(3df,3pd)-ss         | 52 b3lyp/tzvp-m                                   |
| 11 b3lyp/6-311g(2df,2pd)-ss | 32 b3lyp/aug-cc-pVTZ-m             | 53 b3lyp/tzvp-ss                                  |
| 12 b3lyp/6-311g(d,p)-m      | 33 b3lyp/aug-cc-pVTZ-ss            | 54 b3lyp/tzvp//b3lyp/tzvp-ss                      |
| 13 b3lyp/6-311g(d,p)-ss     | 34 b3lyp/aug-cc-pVTZ-J-m           | 55 b3lyp/epr-III//b3lyp/aug-cc-pVDZ-m             |
| 14 b3lyp/6-311+g(d,p)-m     | 35 b3lyp/aug-cc-pVTZ-J-ss          | 56 b3lyp/epr-III//b3lyp/aug-cc-pVDZ-ss            |
| 15 b3lyp/6-311+g(d,p)-ss    | 36 pw91/aug-cc-pVTZ-J-m            | 57 b3lyp/epr-III-m                                |
| 16 b3lyp/6-311++g(d,p)-m    | 37 pw91/aug-cc-pVTZ-J-ss           | 58 b3lyp/epr-III-ss                               |
| 17 b3lyp/6-311++g(d,p)-ss   | 38 pbe/aug-cc-pVTZ-J-m             | 59 pbe/NMR-DKH-m                                  |
| 18 b3lyp/6-311+g(2d,p)-m    | 39 pbe/aug-cc-pVTZ-J-ss            | 60 pbe/NMR-DKH-ss                                 |
| 19 b3lyp/6-311+g(2d,p)-ss   | 40 b3lyp/6-31g-J-ss                | 61 pbe/ccJ-pVDZ-ss                                |
| 20 b3lyp/6-31g(d,3pd)-m     | 41 b3lyp/6-31g-J//b3lyp/6-31g-J-ss | 62 B3PW91/6-311++g(d,p)// B3PW91/6-311++g(d,p)-m  |
| 21 b3lyp/6-31g(d,3pd)-ss    | 42 b3lyp/6-31+g(d)-J-ss            | 63 B3PW91/6-311++g(d,p)// B3PW91/6-311++g(d,p)-ss |

**Figure 3S.** Score plot of two new vectors,  $t_1$  vs  $t_2$ , describing 99.1% variations among 62 different combination of functional/basis sets used to calculate 22  $^1J_{CH}$  couplings of strychnine and the set of experimental  $^1J_{CH}$  couplings. Unless otherwise stated the 3D structure of strychnine was optimized at the B3LYP/6-31G(d) level. M and ss suffixes denote mixed and spinspin methods of  $J$ -coupling calculation. Experimental  $J$ -couplings (**1**) are best approximated by model chemistries 8, 20 and 53 which is consistent with RMSD data (see Table 1S).

### 1JCH Loading Plot (PCA-X)

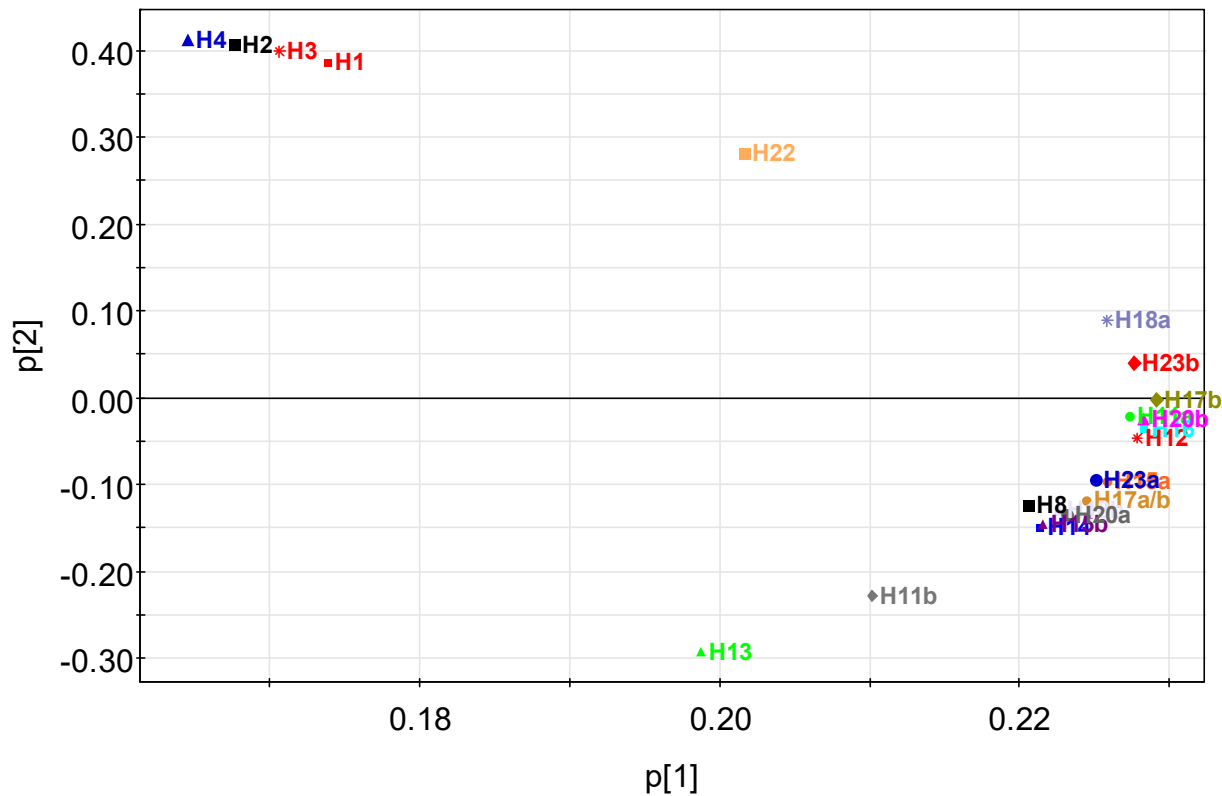

**Figure 4S.** Loading plot of p1 vs p2 showing which  $J$ -couplings describe the similarities and dissimilarities between different combinations of functional/basis sets used to calculate 22  $^1J_{\text{CH}}$  couplings of strychnine and the set of experimental  $^1J_{\text{CH}}$  couplings. Largest differences are seen for  $J$ -couplings of aromatic protons (H1-H4), aliphatic H22 and protons H13, H11b.

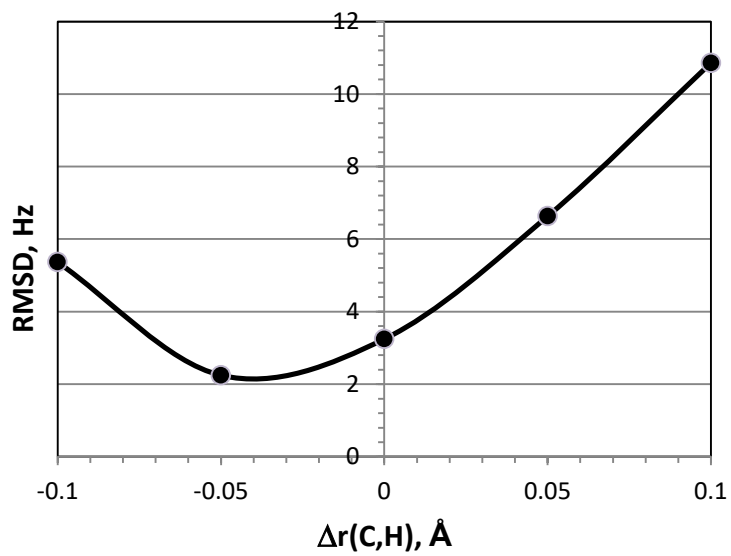

**Figure 5S.** RMSD of  $^1J_{CH}$  couplings of strychnine (B3LYP/6-31G(d,p)(mixed)) as a function of the C-H distance deviations ( $\Delta r(C,H)$ ) from the C-H distances calculated at the B3LYP/6-31G(d) level of theory.

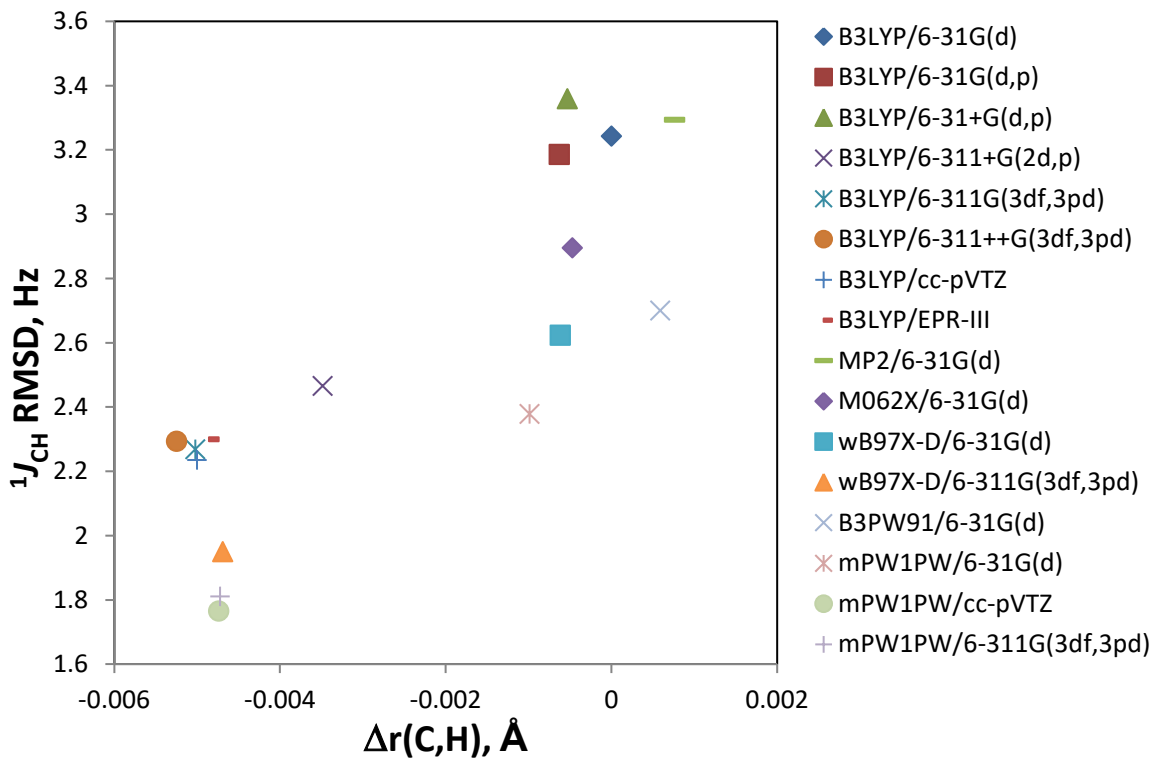

**Figure 6S.** RMSD of  $^1J_{CH}$  couplings of strychnine (B3LYP/6-31G(d,p)(mixed)) as a function of the average C-H distance deviations ( $\Delta r(C,H)$ ) from the C-H distances calculated at the B3LYP/6-31G(d) level of theory for 16 different geometry optimization models.

**Table 3S.** RMSD and differences between mean values of experimental and calculated  $J$ -couplings ( $\Delta J$ ) for 22  $^1J_{\text{CH}}$  couplings of strychnine calculated at B3LYP/6-31G(d,p)(mixed) and B3LYP/TZVP(spinspin) levels<sup>a</sup> for strychnine geometries optimized by 16 different methods.

| Geometry optimization methods  | B3LYP/6-31G(d,p) |                              | B3LYP/TZVP |                              |
|--------------------------------|------------------|------------------------------|------------|------------------------------|
|                                | RMSD, Hz         | $\Delta J$ , Hz <sup>b</sup> | RMSD, Hz   | $\Delta J$ , Hz <sup>b</sup> |
| B3LYP/6-31G(d)                 | 3.24             | -2.77                        | 3.17       | 2.27                         |
| B3LYP/6-31G(d,p)               | 3.19             | -2.70                        | 3.23       | 2.33                         |
| B3LYP/6-31+G(d,p)              | 3.36             | -2.89                        | 3.15       | 2.14                         |
| B3LYP/6-311+G(2d,p)            | 2.47             | -1.88                        | 3.70       | 3.06                         |
| B3LYP/6-311G(3df,3pd)          | 2.27             | -1.57                        | 3.92       | 3.32                         |
| B3LYP/6-311++G(3df,3pd)        | 2.29             | -1.60                        | 3.91       | 3.28                         |
| B3LYP/cc-pVTZ                  | 2.24             | -1.56                        | 3.92       | 3.33                         |
| B3LYP/EPR-III                  | 2.30             | -1.63                        | 3.90       | 3.27                         |
| MP2/6-31G(d)                   | 3.29             | -2.71                        | 3.37       | 2.37                         |
| M062x/6-31G(d)                 | 2.89             | -2.25                        | 3.61       | 2.79                         |
| $\omega$ B97XD/6-31G(d)        | 2.62             | -1.96                        | 3.81       | 3.07                         |
| $\omega$ B97XD/6-311G(3df,3pd) | 1.95             | -0.85                        | 4.60       | 4.06                         |
| B3PW91/6-31G(d)                | 2.70             | -2.06                        | 3.78       | 3.00                         |
| mPW1PW/6-31G(d)                | 2.38             | -1.59                        | 4.12       | 3.41                         |
| mPW1PW/6-311G(3df,3pd)         | 1.81             | -0.51                        | 4.90       | 4.39                         |
| mPW1PW/cc-pVTZ                 | 1.77             | -0.51                        | 4.90       | 4.39                         |

<sup>a</sup> mixed and spinspin type of calculations were used for B3LYP/6-31G(d,p) and B3LYP/TZVP levels of theory, respectively; <sup>b</sup>  $\Delta J = \overline{j^{exp}} - \overline{j^{calc}}$

**Table 4S.**  $^1J_{\text{CH}}$  Couplings, RMSD and differences between mean values of experimental and calculated  $J$ -couplings ( $\Delta J$ ) for 22  $^1J_{\text{CH}}$  couplings of strychnine calculated at the B3LYP/6-31G(d,p) level<sup>a</sup> for strychnine geometries optimized by 15 different methods.

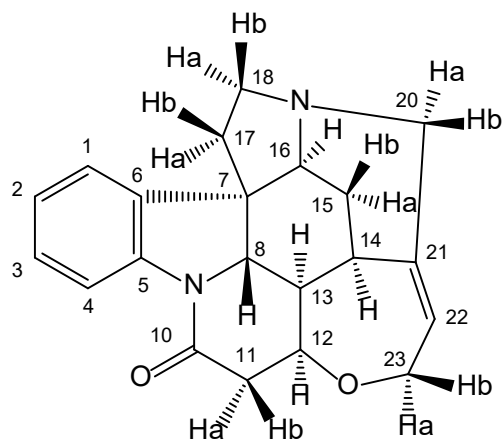

| Proton                                       | Exp.   | B3LYP/6-31G(d,p) | B3LYP/6-31+G(d,p) | B3LYP/6-311+G(2d,p) | B3LYP/6-311G(3df,3pd) | B3LYP/6-311++G(3df,3pd) | B3LYP/cc-pVTZ | B3LYP/EPR-III | MP2/6-31G(d) |
|----------------------------------------------|--------|------------------|-------------------|---------------------|-----------------------|-------------------------|---------------|---------------|--------------|
| H1                                           | 158.36 | 160.0            | 160.3             | 158.8               | 158.3                 | 158.4                   | 158.4         | 158.6         | 161.2        |
| H11a                                         | 134.16 | 140.1            | 140.7             | 139.9               | 139.5                 | 139.9                   | 139.5         | 139.9         | 139.1        |
| H11b                                         | 124.74 | 129.9            | 129.7             | 128.8               | 128.7                 | 128.3                   | 128.5         | 128.3         | 130.7        |
| H12                                          | 149.12 | 149.1            | 149.1             | 148.1               | 147.6                 | 147.7                   | 147.8         | 147.8         | 149.9        |
| H13                                          | 124.2  | 128.1            | 127.9             | 127.2               | 127.3                 | 127.2                   | 127.1         | 127.0         | 127.9        |
| H14                                          | 129.82 | 133.3            | 133.2             | 132.4               | 132.2                 | 132.1                   | 132.1         | 132.1         | 132.9        |
| H15a                                         | 130.96 | 133.7            | 133.6             | 132.9               | 132.8                 | 132.8                   | 132.7         | 132.7         | 132.9        |
| H15b                                         | 129.94 | 133.3            | 133.4             | 132.6               | 132.3                 | 132.3                   | 132.3         | 132.3         | 132.7        |
| H16                                          | 146.36 | 150.7            | 150.9             | 149.9               | 149.7                 | 149.8                   | 149.7         | 149.8         | 149.1        |
| H17a/b                                       | 134.12 | 134.2            | 134.6             | 133.8               | 133.6                 | 133.7                   | 133.5         | 133.6         | 134.5        |
| H17b/a                                       | 134.12 | 138.4            | 138.4             | 137.7               | 137.5                 | 137.5                   | 137.5         | 137.5         | 138.1        |
| H18a                                         | 145.92 | 148.6            | 149.0             | 147.9               | 147.7                 | 147.7                   | 147.7         | 147.8         | 147.4        |
| H18b                                         | 130.24 | 132.9            | 133.0             | 132.5               | 132.1                 | 132.1                   | 132.1         | 132.1         | 133.8        |
| H2                                           | 159.8  | 163.7            | 164.1             | 162.5               | 162.1                 | 162.2                   | 162.1         | 162.2         | 163.4        |
| H20a                                         | 138.16 | 141.4            | 141.8             | 140.6               | 140.6                 | 140.5                   | 140.5         | 140.6         | 141.4        |
| H20b                                         | 137.86 | 140.6            | 140.6             | 139.9               | 139.6                 | 139.6                   | 139.6         | 139.6         | 139.8        |
| H22                                          | 158.4  | 162.0            | 162.3             | 160.9               | 160.3                 | 160.5                   | 160.4         | 160.6         | 163.7        |
| H23a                                         | 136.64 | 137.9            | 138.2             | 137.5               | 136.8                 | 136.9                   | 137.0         | 137.0         | 139.2        |
| H23b                                         | 144.42 | 147.8            | 148.3             | 147.2               | 147.1                 | 147.1                   | 147.1         | 147.2         | 146.3        |
| H3                                           | 158.6  | 162.3            | 162.8             | 161.4               | 160.7                 | 160.9                   | 160.9         | 161.1         | 162.3        |
| H4                                           | 168.26 | 176.2            | 176.6             | 174.5               | 174.1                 | 174.1                   | 174.1         | 174.2         | 177.8        |
| H8                                           | 144.94 | 148.3            | 148.3             | 147.4               | 147.2                 | 147.1                   | 147.1         | 147.0         | 148.7        |
| <b>RMSD, Hz</b>                              |        | 3.19             | 3.36              | 2.47                | 2.27                  | 2.29                    | 2.24          | 2.30          | 3.29         |
| <b><math>\Delta J</math>, Hz<sup>b</sup></b> |        | -2.70            | -2.89             | -1.88               | -1.57                 | -1.60                   | -1.56         | -1.63         | -2.71        |

| Proton                    | Exp.   | M062x/6-31G(d) | ωB97X-D/6-31G(d) | ωB97X-D/6-311G(3df,3pd) | B3PW91/6-31G(d) | mPW1PW/6-31G(d) | mPW1PW/6-311G(3df,3pd) | mPW1PW/cc-pVTZ | mPW1PW/cc-pVTZ <sup>c</sup> |
|---------------------------|--------|----------------|------------------|-------------------------|-----------------|-----------------|------------------------|----------------|-----------------------------|
| H1                        | 158.36 | 159.6          | 159.4            | 157.8                   | 159.6           | 159.1           | 157.6                  | 157.7          | 158.9                       |
| H11a                      | 134.16 | 140.3          | 139.9            | 139.8                   | 139.4           | 139.0           | 138.7                  | 138.7          | 137.6                       |
| H11b                      | 124.74 | 129.1          | 129.1            | 127.6                   | 129.1           | 128.6           | 127.2                  | 127.0          | 126.2                       |
| H12                       | 149.12 | 148.2          | 148.0            | 146.6                   | 148.1           | 147.5           | 146.0                  | 146.2          | 147.9                       |
| H13                       | 124.2  | 127.8          | 127.5            | 126.5                   | 127.6           | 127.2           | 126.2                  | 126.1          | 126.0                       |
| H14                       | 129.82 | 132.9          | 132.6            | 131.4                   | 132.4           | 132.0           | 130.8                  | 130.7          | 131.5                       |
| H15a                      | 130.96 | 133.4          | 133.2            | 132.3                   | 133.2           | 132.8           | 131.9                  | 131.9          | 131.3                       |
| H15b                      | 129.94 | 133.0          | 132.9            | 132.0                   | 132.8           | 132.4           | 131.5                  | 131.5          | 131.7                       |
| H16                       | 146.36 | 149.4          | 149.1            | 148.1                   | 149.5           | 148.9           | 147.9                  | 147.9          | 147.6                       |
| H17a/b                    | 134.12 | 134.2          | 134.0            | 133.3                   | 133.9           | 133.6           | 132.9                  | 132.9          | 132.0                       |
| H17b/a                    | 134.12 | 138.6          | 138.2            | 137.3                   | 138.0           | 137.7           | 136.9                  | 136.9          | 136.4                       |
| H18a                      | 145.92 | 148.1          | 148.0            | 147.1                   | 147.8           | 147.3           | 146.6                  | 146.6          | 146.1                       |
| H18b                      | 130.24 | 132.5          | 132.1            | 131.2                   | 132.4           | 132.0           | 131.2                  | 131.2          | 131.1                       |
| H2                        | 159.8  | 162.8          | 162.7            | 161.2                   | 163.3           | 162.7           | 161.3                  | 161.3          | 161.8                       |
| H20a                      | 138.16 | 140.9          | 140.5            | 139.5                   | 140.7           | 140.2           | 139.3                  | 139.3          | 138.8                       |
| H20b                      | 137.86 | 140.2          | 139.8            | 138.9                   | 139.8           | 139.3           | 138.5                  | 138.4          | 138.1                       |
| H22                       | 158.4  | 162.4          | 161.9            | 160.4                   | 162.0           | 161.6           | 160.1                  | 160.2          | 160.3                       |
| H23a                      | 136.64 | 136.9          | 136.8            | 135.6                   | 137.2           | 136.6           | 135.4                  | 135.7          | 135.9                       |
| H23b                      | 144.42 | 146.8          | 146.6            | 145.9                   | 146.7           | 146.0           | 145.4                  | 145.4          | 145.1                       |
| H3                        | 158.6  | 161.2          | 161.3            | 159.7                   | 161.9           | 161.2           | 159.7                  | 159.9          | 159.8                       |
| H4                        | 168.26 | 176.1          | 175.5            | 173.6                   | 176.0           | 175.5           | 173.7                  | 173.6          | 171.3                       |
| H8                        | 144.94 | 148.3          | 147.3            | 146.1                   | 147.2           | 146.7           | 145.6                  | 145.5          | 145.4                       |
| <b>RMSD, Hz</b>           |        | 2.89           | 2.62             | 1.95                    | 2.70            | 2.38            | 1.81                   | 1.77           | 1.60                        |
| <b>ΔJ, Hz<sup>b</sup></b> |        | -2.25          | -1.96            | -0.85                   | -2.06           | -1.59           | -0.51                  | -0.51          | -0.99                       |

<sup>a</sup>J-Couplings were calculated with mixed method; <sup>b</sup>ΔJ =  $\overline{J^{exp}} - \overline{J^{calc}}$ ; <sup>c</sup>J-couplings were calculated at the

B3LYP/6-31G(d,p) level of theory using the polarizable continuum model (PCM) for chloroform.

**Table 5S.** Experimental and DFT calculated  $119\text{ }^1J_{\text{CH}}$  couplings for 62 compounds<sup>a</sup>

| Compound                 | Experimental, <sup>a</sup><br>Hz | Calculated, <sup>b</sup><br>Hz | $\Delta J$ , <sup>c</sup> Hz |
|--------------------------|----------------------------------|--------------------------------|------------------------------|
| 1,1-dibromoethene        | 167.0                            | 170.3                          | 3.3                          |
| 1,2,3-triazole           | 194.0                            | 195.2                          | 1.2                          |
| 1,2-difluorobenzene      | 163.9                            | 163.3                          | -0.6                         |
|                          | 163.8                            | 163.3                          | -0.4                         |
| 1,3,4-triazole           | 209.0                            | 212.4                          | 3.4                          |
| 1,3,5-triazine           | 207.2                            | 206.7                          | -0.5                         |
| 1,3-difluorobenzene      | 163.6                            | 162.5                          | -1.2                         |
|                          | 165.3                            | 166.3                          | 1.0                          |
|                          | 165.5                            | 166.8                          | 1.3                          |
| 5,5-dimethyl-1,3-dioxane | 167.5                            | 168.3                          | 0.8                          |
|                          | 157.4                            | 153.5                          | -3.9                         |
| 5-methylenenorbornene    | 130.7                            | 131.0                          | 0.3                          |
|                          | 131.4                            | 132.4                          | 1.0                          |
|                          | 136.0                            | 137.9                          | 1.9                          |
|                          | 136.8                            | 138.7                          | 1.9                          |
|                          | 147.7                            | 147.6                          | -0.1                         |
|                          | 148.3                            | 149.3                          | 1.0                          |
|                          | 155.1                            | 158.9                          | 3.8                          |
|                          | 157.0                            | 160.2                          | 3.2                          |
|                          | 168.9                            | 171.4                          | 2.5                          |
|                          | 170.8                            | 173.8                          | 3.0                          |
| acetaldehyde             | 172.4                            | 168.3                          | -4.1                         |
| acetonitrile             | 136.2                            | 135.8                          | -0.4                         |
| acetophenone             | 127.3                            | 128.7                          | 1.4                          |
| acetylene                | 248.7                            | 261.4                          | 12.7                         |
| acrylonitrile            | 165.4                            | 166.1                          | 0.7                          |
|                          | 163.1                            | 166.7                          | 3.6                          |
|                          | 176.7                            | 173.0                          | -3.7                         |
| allene                   | 167.8                            | 171.6                          | 3.8                          |
| alpha-pinene             | 127.0                            | 127.4                          | 0.4                          |
|                          | 127.0                            | 127.7                          | 0.7                          |
|                          | 137.0                            | 137.0                          | 0.0                          |
|                          | 137.0                            | 142.9                          | 5.9                          |
|                          | 144.0                            | 143.0                          | -1.0                         |
|                          | 144.0                            | 144.2                          | 0.2                          |
|                          | 158.0                            | 159.9                          | 1.9                          |
| anthracene               | 159.5                            | 158.8                          | -0.7                         |
| benzaldehyde             | 173.7                            | 170.9                          | -2.8                         |
| benzene                  | 159.0                            | 159.1                          | 0.1                          |
| bromoethene              | 160.0                            | 163.1                          | 3.1                          |
|                          | 163.7                            | 167.7                          | 4.0                          |
| carene                   | 125.0                            | 124.6                          | -0.4                         |
|                          | 125.0                            | 125.6                          | 0.6                          |
|                          | 125.0                            | 126.3                          | 1.3                          |
|                          | 125.0                            | 127.4                          | 2.4                          |



| Compound            | Experimental, <sup>a</sup><br>Hz | Calculated, <sup>b</sup><br>Hz | $\Delta J$ , <sup>c</sup> Hz |
|---------------------|----------------------------------|--------------------------------|------------------------------|
| carene              | 160.9                            | 164.3                          | 3.4                          |
|                     | 162.6                            | 166.3                          | 3.6                          |
|                     | 159.0                            | 156.8                          | -2.2                         |
| chloroethene        | 153.8                            | 156.2                          | 2.4                          |
|                     | 167.1                            | 175.5                          | 8.4                          |
| cis-1-chloropropene | 180.0                            | 181.5                          | 1.5                          |
| cubane              | 134.0                            | 132.2                          | -1.8                         |
| cyanoallene         | 137.2                            | 138.4                          | 1.3                          |
|                     | 168.6                            | 171.4                          | 2.8                          |
| cyclobutane         | 122.4                            | 124.1                          | 1.7                          |
| cyclobutene         | 126.4                            | 128.5                          | 2.1                          |
|                     | 162.0                            | 162.5                          | 0.5                          |
|                     | 160.0                            | 162.5                          | 2.5                          |
| cyclohexane         | 167.0                            | 170.0                          | 3.0                          |
| cyclopropane        | 184.5                            | 179.0                          | -5.5                         |
|                     | 125.3                            | 126.6                          | 1.3                          |
| cyclopropene        | 156.3                            | 159.3                          | 3.0                          |
| difluoromethane     | 159.5                            | 157.7                          | -1.8                         |
| ethane              | 159.5                            | 158.6                          | -0.9                         |
| ethene              | 157.0                            | 158.9                          | 1.9                          |
| fluorene            | 159.0                            | 159.3                          | 0.3                          |
|                     | 275.0                            | 293.2                          | 18.2                         |
|                     | 162.2                            | 163.1                          | 0.9                          |
|                     | 159.2                            | 164.6                          | 5.4                          |
| fluoroacetylene     | 200.2                            | 196.4                          | -3.8                         |
| fluoroethene        | 149.1                            | 147.1                          | -2.0                         |
|                     | 172.0                            | 176.2                          | 4.2                          |
|                     | 175.0                            | 176.6                          | 1.6                          |
| fluoromethane       | 202.0                            | 203.7                          | 1.7                          |
| formaldehyde        | 269.0                            | 270.4                          | 1.4                          |
| furan               | 189.0                            | 189.6                          | 0.6                          |
|                     | 206.0                            | 209.8                          | 3.8                          |
| HCN                 | 125.0                            | 128.2                          | 3.2                          |
| imidazole           | 140.0                            | 137.3                          | -2.7                         |
|                     | 132.6                            | 130.6                          | -2.0                         |
| methane             | 133.9                            | 131.1                          | -2.8                         |
| methylether         | 145.9                            | 146.8                          | 0.9                          |
| norbornene          | 166.9                            | 170.0                          | 3.1                          |
|                     | 131.9                            | 130.6                          | -1.3                         |
|                     | 175.5                            | 175.8                          | 0.3                          |
|                     | 154.8                            | 156.4                          | 1.6                          |
| norbornenone        | 160.5                            | 159.1                          | -1.4                         |
| oxirane             | 248.0                            | 263.3                          | 15.3                         |
| o-xylene            | 159.5                            | 162.4                          | 2.9                          |
|                     | 163.0                            | 172.2                          | 9.2                          |
| phenylacetylene     | 160.9                            | 164.3                          | 3.4                          |
| phenylallene        | 162.6                            | 166.3                          | 3.6                          |
|                     | 159.0                            | 156.8                          | -2.2                         |

| Compound              | Experimental, <sup>a</sup><br>Hz | Calculated, <sup>b</sup><br>Hz | $\Delta J$ , <sup>c</sup> Hz |
|-----------------------|----------------------------------|--------------------------------|------------------------------|
| prismane              | 180.0                            | 185.7                          | 5.7                          |
| propene               | 152.0                            | 152.3                          | 0.3                          |
|                       | 153.3                            | 157.0                          | 3.7                          |
|                       | 157.0                            | 160.4                          | 3.4                          |
| propyne               | 248.0                            | 260.9                          | 12.9                         |
| pyrazine              | 182.7                            | 181.9                          | -0.8                         |
| pyrazole              | 177.0                            | 178.5                          | 1.5                          |
|                       | 186.0                            | 188.3                          | 2.3                          |
| pyridazine            | 169.9                            | 166.1                          | -3.8                         |
|                       | 182.5                            | 182.7                          | 0.2                          |
| pyridine              | 162.4                            | 161.3                          | -1.1                         |
|                       | 163.0                            | 162.5                          | -0.5                         |
|                       | 177.6                            | 178.8                          | 1.1                          |
| pyrimidine            | 168.0                            | 166.6                          | -1.4                         |
|                       | 181.8                            | 180.9                          | -0.9                         |
|                       | 206.0                            | 204.6                          | -1.4                         |
| pyrrole               | 169.0                            | 172.7                          | 3.7                          |
|                       | 183.0                            | 185.3                          | 2.3                          |
| salicylaldehyde       | 159.4                            | 158.4                          | -1.0                         |
|                       | 160.3                            | 159.0                          | -1.3                         |
|                       | 162.6                            | 164.7                          | 2.1                          |
|                       | 164.9                            | 165.2                          | 0.3                          |
| thiirane              | 170.5                            | 172.8                          | 2.3                          |
| tms                   | 120.0                            | 122.7                          | 2.7                          |
| trichloroacetaldehyde | 207.0                            | 208.6                          | 1.6                          |
| trifluoromethane      | 239.1                            | 232.8                          | -6.3                         |

<sup>a</sup> Experimental  $J$ -couplings from ref. 7. Assignments of individual couplings for each compound see in ref. 7;

<sup>b</sup>  $J$ -couplings were calculated at the B3LYP/6-31G(d,p)(mixed)//mPW1PW/cc-pVTZ level of theory; RMSD for all couplings except for four alkynes is 2.7 Hz (1.6%);

$$^c \Delta J = J^{calc} - J^{exp}.$$

**Table 6S.** DFT-calculated  $^1J_{CH}$  coupling (Hz) in acetylene using 18 x 18 combinations of geometry optimization and  $J$ -coupling model chemistries

| $J$ -coupling calculation | Geometry optimization |                |                  |                 |                   |                  |                    |                 |                   |                  |                    |                   |                     |               |               |                   |                   |                     |
|---------------------------|-----------------------|----------------|------------------|-----------------|-------------------|------------------|--------------------|-----------------|-------------------|------------------|--------------------|-------------------|---------------------|---------------|---------------|-------------------|-------------------|---------------------|
|                           | b3lyp/STO-3g          | b3lyp/6-31g(d) | b3lyp/6-31g(d,p) | b3lyp/6-31+g(d) | b3lyp/6-31+g(d,p) | b3lyp/6-31++g(d) | b3lyp/6-31++g(d,p) | b3lyp/6-311g(d) | b3lyp/6-311g(d,p) | b3lyp/6-311+g(d) | b3lyp/6-311+g(d,p) | b3lyp/6-311++g(d) | b3lyp/6-311++g(d,p) | b3lyp/cc-pVDZ | b3lyp/cc-pVTZ | b3lyp/aug-cc-pVDZ | b3lyp/aug-cc-pVTZ | b3lyp/aug-cc-pVTZ-J |
| b3lyp/STO-3g              | 200.0                 | 197.8          | 197.7            | 198.3           | 198.2             | 198.3            | 198.2              | 196.6           | 196.1             | 196.8            | 196.4              | 196.8             | 196.4               | 199.6         | 195.6         | 199.3             | 195.7             | 195.7               |
| b3lyp/6-31g(d)            | 210.6                 | 207.1          | 206.9            | 208.2           | 208.0             | 208.2            | 208.0              | 204.6           | 203.8             | 205.1            | 204.3              | 205.1             | 204.3               | 210.5         | 202.8         | 209.9             | 202.8             | 202.9               |
| b3lyp/6-31g(d,p)          | 201.7                 | 196.7          | 196.4            | 197.9           | 197.6             | 197.9            | 197.6              | 193.7           | 192.7             | 194.2            | 193.2              | 194.2             | 193.2               | 200.8         | 191.4         | 200.0             | 191.5             | 191.6               |
| b3lyp/6-31+g(d)           | 218.1                 | 214.8          | 214.6            | 215.9           | 215.7             | 215.9            | 215.7              | 212.2           | 211.5             | 212.7            | 212.0              | 212.7             | 212.0               | 218.1         | 210.4         | 217.6             | 210.5             | 210.6               |
| b3lyp/6-31+g(d,p)         | 209.1                 | 204.3          | 204.0            | 205.6           | 205.2             | 205.6            | 205.2              | 201.3           | 200.3             | 201.8            | 200.8              | 201.8             | 200.8               | 208.4         | 199.0         | 207.7             | 199.1             | 199.2               |
| b3lyp/6-31++g(d)          | 220.9                 | 217.7          | 217.5            | 218.8           | 218.6             | 218.8            | 218.6              | 215.1           | 214.4             | 215.6            | 214.9              | 215.6             | 214.9               | 221.0         | 213.3         | 220.4             | 213.4             | 213.5               |
| b3lyp/6-31++g(d,p)        | 211.9                 | 207.2          | 206.9            | 208.4           | 208.1             | 208.4            | 208.1              | 204.2           | 203.2             | 204.7            | 203.7              | 204.7             | 203.7               | 211.3         | 201.9         | 210.5             | 202.0             | 202.1               |
| b3lyp/6-311g(d)           | 256.6                 | 255.3          | 255.3            | 256.1           | 256.1             | 256.1            | 256.1              | 253.4           | 252.9             | 253.7            | 253.3              | 253.7             | 253.3               | 257.5         | 252.2         | 257.2             | 252.2             | 252.3               |
| b3lyp/6-311g(d,p)         | 252.7                 | 252.3          | 252.3            | 253.0           | 253.0             | 253.0            | 253.0              | 250.4           | 250.1             | 250.8            | 250.5              | 250.8             | 250.5               | 254.1         | 249.4         | 253.9             | 249.5             | 249.5               |
| b3lyp/6-311+g(d)          | 257.2                 | 256.0          | 255.9            | 256.8           | 256.8             | 256.8            | 256.8              | 254.0           | 253.6             | 254.4            | 254.0              | 254.4             | 254.0               | 258.2         | 252.8         | 257.9             | 252.9             | 252.9               |
| b3lyp/6-311+g(d,p)        | 252.9                 | 252.4          | 252.4            | 253.2           | 253.2             | 253.2            | 253.2              | 250.5           | 250.2             | 250.9            | 250.6              | 250.9             | 250.6               | 254.3         | 249.5         | 254.1             | 249.6             | 249.6               |
| b3lyp/6-311++g(d)         | 256.9                 | 255.7          | 255.6            | 256.5           | 256.4             | 256.5            | 256.5              | 253.7           | 253.3             | 254.1            | 253.7              | 254.1             | 253.7               | 257.9         | 252.5         | 257.6             | 252.6             | 252.6               |
| b3lyp/6-311++g(d,p)       | 252.5                 | 251.9          | 251.9            | 252.7           | 252.7             | 252.7            | 252.7              | 250.1           | 249.7             | 250.4            | 250.1              | 250.4             | 250.1               | 253.8         | 249.0         | 253.6             | 249.1             | 249.1               |
| b3lyp/cc-pVDZ             | 225.2                 | 222.6          | 222.5            | 223.5           | 223.4             | 223.6            | 223.4              | 220.4           | 219.7             | 220.8            | 220.2              | 220.8             | 220.1               | 225.4         | 218.8         | 225.0             | 218.9             | 219.0               |
| b3lyp/cc-pVTZ             | 259.0                 | 255.6          | 255.4            | 256.5           | 256.3             | 256.6            | 256.3              | 253.3           | 252.5             | 253.7            | 252.9              | 253.7             | 252.9               | 257.7         | 251.5         | 258.1             | 251.6             | 251.7               |
| b3lyp/aug-cc-pVDZ         | 305.4                 | 305.8          | 305.9            | 306.7           | 306.7             | 306.7            | 306.7              | 303.9           | 303.6             | 304.3            | 304.0              | 304.3             | 304.0               | 307.6         | 302.8         | 307.5             | 302.9             | 302.9               |
| b3lyp/aug-cc-pVTZ         | 263.2                 | 261.9          | 261.8            | 262.8           | 262.7             | 262.8            | 262.7              | 259.8           | 259.3             | 260.2            | 259.7              | 260.2             | 259.7               | 264.3         | 258.4         | 264.0             | 258.5             | 258.6               |
| b3lyp/aug-cc-pVTZ-J       | 279.2                 | 276.7          | 276.6            | 277.8           | 277.6             | 277.8            | 277.6              | 274.3           | 273.6             | 274.7            | 274.1              | 274.7             | 274.1               | 279.7         | 272.6         | 279.3             | 272.7             | 272.8               |

**Table 7S.** Differences between experimental (249 Hz) and DFT-calculated  $^1J_{CH}$  coupling in acetylene using 18 x 18 combinations of geometry optimization and  $J$ -coupling model chemistries

| $J$ -coupling calculation | Geometry optimization |                |                  |                 |                   |                  |                    |                 |                   |                  |                    |                   |                     |               |               |                   |                   |                     |
|---------------------------|-----------------------|----------------|------------------|-----------------|-------------------|------------------|--------------------|-----------------|-------------------|------------------|--------------------|-------------------|---------------------|---------------|---------------|-------------------|-------------------|---------------------|
|                           | b3lyp/STO-3g          | b3lyp/6-31g(d) | b3lyp/6-31g(d,p) | b3lyp/6-31+g(d) | b3lyp/6-31+g(d,p) | b3lyp/6-31++g(d) | b3lyp/6-31++g(d,p) | b3lyp/6-311g(d) | b3lyp/6-311g(d,p) | b3lyp/6-311+g(d) | b3lyp/6-311+g(d,p) | b3lyp/6-311++g(d) | b3lyp/6-311++g(d,p) | b3lyp/cc-pVDZ | b3lyp/cc-pVTZ | b3lyp/aug-cc-pVDZ | b3lyp/aug-cc-pVTZ | b3lyp/aug-cc-pVTZ-J |
| b3lyp/STO-3g              | 49.0                  | 51.2           | 51.3             | 50.7            | 50.8              | 50.7             | 50.8               | 52.4            | 52.9              | 52.2             | 52.6               | 52.2              | 52.6                | 49.4          | 53.4          | 49.7              | 53.3              | 53.3                |
| b3lyp/6-31g(d)            | 38.4                  | 41.9           | 42.1             | 40.8            | 41.0              | 40.8             | 41.0               | 44.4            | 45.2              | 43.9             | 44.7               | 43.9              | 44.7                | 38.5          | 46.2          | 39.1              | 46.2              | 46.1                |
| b3lyp/6-31g(d,p)          | 47.3                  | 52.3           | 52.6             | 51.1            | 51.5              | 51.1             | 51.4               | 55.3            | 56.3              | 54.8             | 55.8               | 54.8              | 55.8                | 48.2          | 57.6          | 49.0              | 57.5              | 57.4                |
| b3lyp/6-31+g(d)           | 30.9                  | 34.2           | 34.4             | 33.1            | 33.3              | 33.1             | 33.3               | 36.8            | 37.5              | 36.3             | 37.0               | 36.3              | 37.0                | 30.9          | 38.6          | 31.4              | 38.5              | 38.4                |
| b3lyp/6-31+g(d,p)         | 39.9                  | 44.7           | 45.0             | 43.4            | 43.8              | 43.4             | 43.8               | 47.7            | 48.7              | 47.2             | 48.2               | 47.2              | 48.2                | 40.6          | 50.0          | 41.3              | 49.9              | 49.8                |
| b3lyp/6-31++g(d)          | 28.1                  | 31.3           | 31.5             | 30.2            | 30.4              | 30.2             | 30.4               | 33.9            | 34.6              | 33.4             | 34.1               | 33.4              | 34.1                | 28.0          | 35.7          | 28.6              | 35.6              | 35.5                |
| b3lyp/6-31++g(d,p)        | 37.1                  | 41.8           | 42.1             | 40.6            | 40.9              | 40.6             | 40.9               | 44.8            | 45.8              | 44.3             | 45.3               | 44.3              | 45.3                | 37.7          | 47.1          | 38.5              | 47.0              | 46.9                |
| b3lyp/6-311g(d)           | -7.6                  | -6.3           | -6.3             | -7.1            | -7.1              | -7.1             | -7.1               | -4.4            | -3.9              | -4.7             | -4.3               | -4.7              | -4.3                | -8.5          | -3.2          | -8.2              | -3.2              | -3.3                |
| b3lyp/6-311g(d,p)         | -3.7                  | -3.3           | -3.3             | -4.0            | -4.0              | -4.0             | -4.0               | -1.4            | -1.1              | -1.8             | -1.5               | -1.8              | -1.5                | -5.1          | -0.4          | -4.9              | -0.5              | -0.5                |
| b3lyp/6-311+g(d)          | -8.2                  | -7.0           | -6.9             | -7.8            | -7.8              | -7.8             | -7.8               | -5.0            | -4.6              | -5.4             | -5.0               | -5.4              | -5.0                | -9.2          | -3.8          | -8.9              | -3.9              | -3.9                |
| b3lyp/6-311+g(d,p)        | -3.9                  | -3.4           | -3.4             | -4.2            | -4.2              | -4.2             | -4.2               | -1.5            | -1.2              | -1.9             | -1.6               | -1.9              | -1.6                | -5.3          | -0.5          | -5.1              | -0.6              | -0.6                |
| b3lyp/6-311++g(d)         | -7.9                  | -6.7           | -6.6             | -7.5            | -7.4              | -7.5             | -7.5               | -4.7            | -4.3              | -5.1             | -4.7               | -5.1              | -4.7                | -8.9          | -3.5          | -8.6              | -3.6              | -3.6                |
| b3lyp/6-311++g(d,p)       | -3.4                  | -2.9           | -2.9             | -3.7            | -3.7              | -3.7             | -3.7               | -1.1            | -0.7              | -1.4             | -1.1               | -1.4              | -1.1                | -4.8          | 0.0           | -4.6              | -0.1              | -0.1                |
| b3lyp/cc-pVDZ             | 23.8                  | 26.4           | 26.5             | 25.5            | 25.6              | 25.5             | 25.6               | 28.6            | 29.3              | 28.2             | 28.8               | 28.2              | 28.9                | 23.6          | 30.2          | 24.0              | 30.1              | 30.0                |
| b3lyp/cc-pVTZ             | -10.0                 | -6.6           | -6.4             | -7.5            | -7.3              | -7.6             | -7.3               | -4.3            | -3.5              | -4.7             | -3.9               | -4.7              | -3.9                | -9.7          | -2.5          | -9.1              | -2.6              | -2.7                |
| b3lyp/aug-cc-pVDZ         | -56.4                 | -56.8          | -56.9            | -57.7           | -57.7             | -57.7            | -57.7              | -54.9           | -54.6             | -55.3            | -55.0              | -55.3             | -55.0               | -58.6         | -53.8         | -58.5             | -53.9             | -53.9               |
| b3lyp/aug-cc-pVTZ         | -14.2                 | -12.9          | -12.8            | -13.8           | -13.7             | -13.8            | -13.7              | -10.8           | -10.3             | -11.2            | -10.7              | -11.2             | -10.7               | -15.3         | -9.4          | -15.0             | -9.5              | -9.6                |
| b3lyp/aug-cc-pVTZ-J       | -30.2                 | -27.7          | -27.6            | -28.8           | -28.6             | -28.8            | -28.6              | -25.3           | -24.6             | -25.7            | -25.1              | -25.7             | -25.1               | -30.7         | -23.6         | -30.3             | -23.7             | -23.8               |

**Table 8S.** Experimental, DFT-calculated, and differences between experimental and calculated  $^1J_{\text{CH}}$  couplings for seven alkynes.

| Compounds       | $J^{\text{exp}}$ , Hz <sup>a</sup> | $J^{\text{calc}}$ , Hz <sup>b</sup> | $\Delta J$ , <sup>c</sup> Hz |
|-----------------|------------------------------------|-------------------------------------|------------------------------|
| chloroacetylene | 270.0                              | 266.0                               | -4.0                         |
| bromoacetylene  | 261.0                              | 261.9                               | 0.9                          |
| iodoacetylene   | 255.0                              | 257.2                               | 2.2                          |
| acetylene       | 249.0                              | 250.1                               | 1.1                          |
| fluoroacetylene | 277.7                              | 280.1                               | 2.4                          |
| phenylacetylene | 251.0                              | 248.8                               | -2.2                         |
| propylene       | 247.6                              | 247.2                               | -0.4                         |

<sup>a</sup> Experimental  $J$ -couplings from ref. 8.

<sup>b</sup>  $J$ -couplings were calculated at the B3LYP/6-311G(d,p)//B3LYP/6-311G(d,p) level of theory using *spinspin* method. RMSD was 2.2 Hz (0.8%).

<sup>c</sup>  $\Delta J = J^{\text{calc}} - J^{\text{exp}}$ .

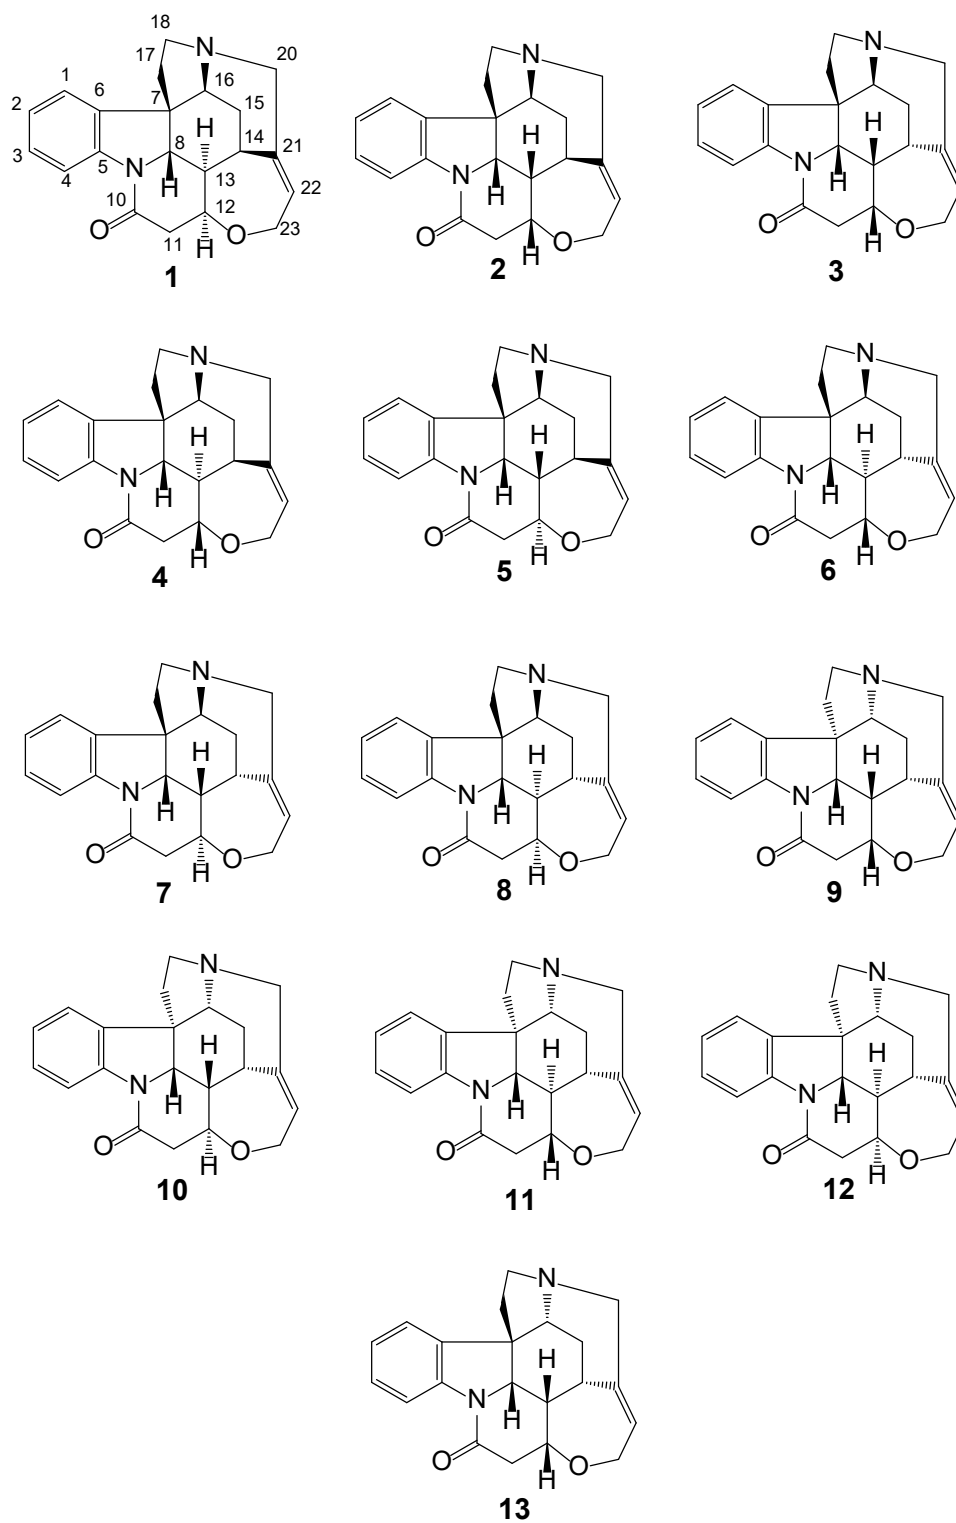

**Figure 7S.** Thirteen energetically feasible diastereomers of strychnine.<sup>[9]</sup>

**Table 9S.**  $^1J_{CH}$  Couplings, RMSD and maximum  $J$ -coupling deviations (max\_d) for possible conformations (**1a-1c**) and diastereomers (**2-13**) of strychnine<sup>a</sup>

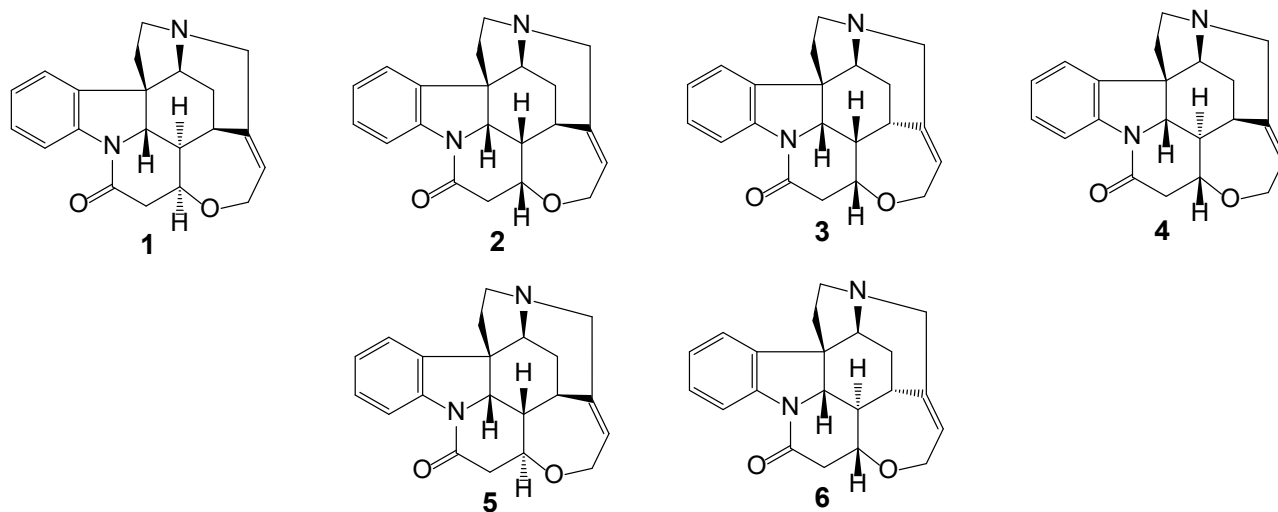

| Proton           | Exp.   | 1a    | 1b    | 1c    | 2     | 3     | 4     | 5     | 6     |
|------------------|--------|-------|-------|-------|-------|-------|-------|-------|-------|
| <b>H1</b>        | 158.36 | 157.1 | 156.3 | 157.5 | 157.4 | 157.9 | 157.4 | 157.3 | 158.3 |
| <b>H11a</b>      | 134.16 | 137.9 | 134.7 | 141.9 | 135.9 | 140.1 | 134.5 | 140.9 | 139.5 |
| <b>H11b</b>      | 124.74 | 126.3 | 128.0 | 123.3 | 127.8 | 122.5 | 131.0 | 126.3 | 121.9 |
| <b>H12</b>       | 149.12 | 145.8 | 145.8 | 151.4 | 143.8 | 141.7 | 142.0 | 144.0 | 148.9 |
| <b>H13</b>       | 124.2  | 125.6 | 127.1 | 128.0 | 132.2 | 128.6 | 131.4 | 131.4 | 131.0 |
| <b>H14</b>       | 129.82 | 130.2 | 131.3 | 137.3 | 139.1 | 140.6 | 137.1 | 134.0 | 140.7 |
| <b>H15a</b>      | 130.96 | 131.2 | 131.9 | 131.2 | 132.5 | 139.8 | 130.8 | 131.7 | 139.6 |
| <b>H15b</b>      | 129.94 | 130.8 | 130.6 | 130.6 | 130.1 | 139.0 | 130.2 | 130.8 | 138.8 |
| <b>H16</b>       | 146.36 | 147.5 | 147.3 | 146.6 | 151.1 | 157.1 | 147.1 | 149.9 | 153.4 |
| <b>H17a/b</b>    | 134.12 | 132.2 | 133.8 | 132.4 | 130.3 | 138.1 | 132.5 | 131.0 | 138.3 |
| <b>H17b/a</b>    | 134.12 | 136.1 | 130.7 | 135.7 | 133.7 | 136.2 | 136.1 | 136.0 | 137.0 |
| <b>H18a</b>      | 145.92 | 145.8 | 140.4 | 146.3 | 144.9 | 148.9 | 146.3 | 145.7 | 149.7 |
| <b>H18b</b>      | 130.24 | 130.5 | 135.9 | 129.9 | 129.7 | 135.2 | 129.6 | 130.0 | 136.1 |
| <b>H2</b>        | 159.8  | 160.7 | 160.5 | 160.7 | 160.7 | 160.3 | 160.7 | 161.0 | 160.5 |
| <b>H20a</b>      | 138.16 | 138.5 | 139.7 | 139.9 | 140.3 | 151.5 | 136.7 | 139.8 | 153.5 |
| <b>H20b</b>      | 137.86 | 137.8 | 135.3 | 137.8 | 137.6 | 136.4 | 138.6 | 137.5 | 139.9 |
| <b>H22</b>       | 158.4  | 159.6 | 158.7 | 151.5 | 154.4 | 160.3 | 153.6 | 161.6 | 160.1 |
| <b>H23a</b>      | 136.64 | 134.9 | 135.1 | 135.2 | 137.0 | 135.9 | 141.6 | 138.5 | 139.2 |
| <b>H23b</b>      | 144.42 | 144.7 | 144.7 | 144.9 | 146.1 | 146.1 | 144.7 | 147.1 | 147.1 |
| <b>H3</b>        | 158.6  | 159.3 | 159.3 | 159.6 | 159.7 | 159.3 | 159.5 | 159.6 | 159.6 |
| <b>H4</b>        | 168.26 | 172.9 | 172.7 | 172.1 | 172.9 | 173.8 | 172.2 | 171.9 | 173.0 |
| <b>H8</b>        | 144.94 | 145.0 | 147.7 | 144.6 | 141.0 | 153.8 | 141.0 | 141.0 | 153.0 |
| <b>RMSD, Hz</b>  |        | 1.77  | 2.64  | 3.12  | 3.66  | 6.23  | 3.60  | 3.22  | 6.12  |
| <b>max_d, Hz</b> |        | 4.60  | 5.47  | 7.21  | 7.57  | 12.75 | 14.86 | 7.98  | 13.70 |

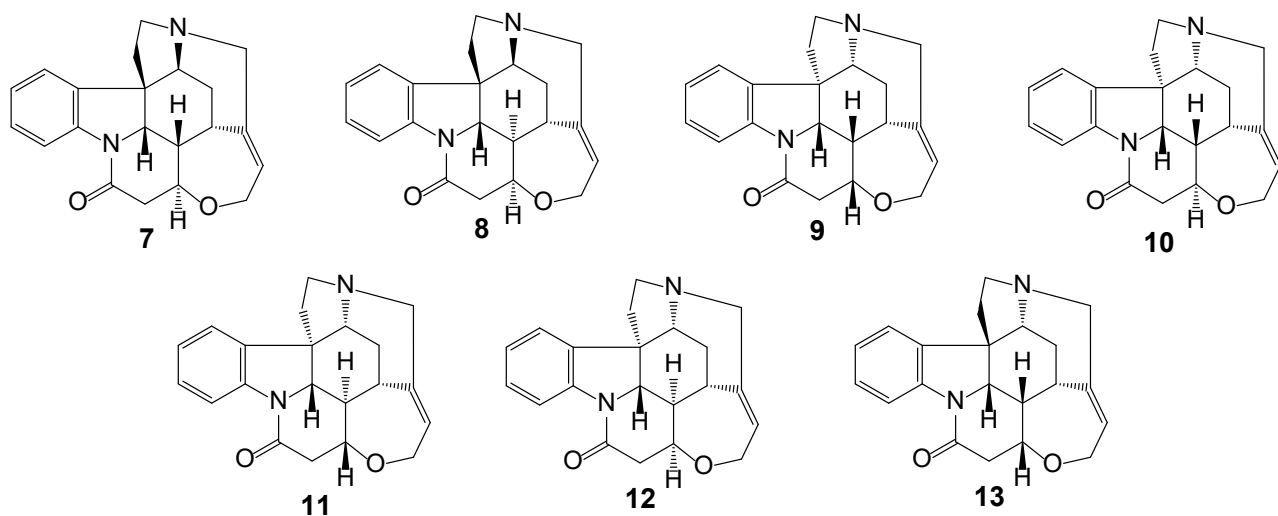

| Proton           | Exp.   | 7     | 8     | 9     | 10    | 11    | 12    | 13    |
|------------------|--------|-------|-------|-------|-------|-------|-------|-------|
| <b>H1</b>        | 158.36 | 158.2 | 158.7 | 158.5 | 158.6 | 158.5 | 158.4 | 155.0 |
| <b>H11a</b>      | 134.16 | 138.3 | 143.0 | 137.9 | 137.6 | 137.3 | 140.1 | 140.1 |
| <b>H11b</b>      | 124.74 | 130.6 | 130.2 | 122.6 | 128.7 | 126.3 | 123.9 | 124.7 |
| <b>H12</b>       | 149.12 | 140.5 | 145.7 | 140.5 | 140.0 | 142.5 | 143.4 | 144.4 |
| <b>H13</b>       | 124.2  | 134.7 | 128.0 | 121.8 | 131.0 | 132.2 | 134.7 | 123.9 |
| <b>H14</b>       | 129.82 | 147.8 | 149.0 | 130.9 | 136.3 | 132.2 | 140.7 | 132.3 |
| <b>H15a</b>      | 130.96 | 139.2 | 139.2 | 132.3 | 131.5 | 131.5 | 131.8 | 132.9 |
| <b>H15b</b>      | 129.94 | 139.2 | 139.0 | 130.2 | 130.1 | 130.2 | 129.7 | 133.0 |
| <b>H16</b>       | 146.36 | 154.0 | 152.8 | 149.0 | 148.9 | 150.4 | 150.7 | 144.3 |
| <b>H17a/b</b>    | 134.12 | 138.1 | 137.5 | 136.6 | 129.6 | 133.6 | 133.2 | 143.7 |
| <b>H17b/a</b>    | 134.12 | 136.6 | 137.3 | 134.2 | 136.4 | 133.5 | 133.2 | 135.0 |
| <b>H18a</b>      | 145.92 | 148.8 | 149.7 | 139.2 | 139.2 | 143.9 | 144.2 | 147.2 |
| <b>H18b</b>      | 130.24 | 135.4 | 136.6 | 137.0 | 137.9 | 131.7 | 131.0 | 139.2 |
| <b>H2</b>        | 159.8  | 160.5 | 160.7 | 160.0 | 160.2 | 160.4 | 160.5 | 159.6 |
| <b>H20a</b>      | 138.16 | 150.9 | 155.1 | 139.1 | 139.3 | 139.4 | 140.2 | 141.0 |
| <b>H20b</b>      | 137.86 | 136.8 | 145.4 | 138.7 | 136.8 | 139.2 | 138.7 | 137.3 |
| <b>H22</b>       | 158.4  | 153.3 | 154.6 | 157.1 | 151.7 | 161.4 | 155.1 | 160.9 |
| <b>H23a</b>      | 136.64 | 141.2 | 140.9 | 135.6 | 141.1 | 136.7 | 139.5 | 134.5 |
| <b>H23b</b>      | 144.42 | 144.6 | 148.5 | 145.0 | 144.3 | 145.9 | 146.2 | 146.2 |
| <b>H3</b>        | 158.6  | 159.5 | 159.6 | 159.7 | 159.9 | 159.9 | 159.9 | 160.1 |
| <b>H4</b>        | 168.26 | 172.7 | 170.9 | 170.9 | 170.7 | 171.1 | 170.1 | 169.8 |
| <b>H8</b>        | 144.94 | 155.7 | 152.7 | 134.8 | 137.6 | 138.0 | 137.4 | 147.1 |
| <b>RMSD, Hz</b>  |        | 7.31  | 7.47  | 3.82  | 4.59  | 3.18  | 4.33  | 3.67  |
| <b>max_d, Hz</b> |        | 8.71  | 8.69  | 18.05 | 9.13  | 9.70  | 8.50  | 10.86 |

<sup>a</sup>J-Couplings were calculated at the B3LYP/6-31G(d,p)(mixed)//mPW1PW/cc-pVTZ level of theory.

## Experimental details for *ent*-Trachyloban-6 $\beta$ ,18,19-trihydroxy-2-one (**14**)

### *General experimental procedures*

Optical rotations were measured on a Rudolph Research Analytical Autopol IV polarimeter equipped with a sodium lamp (589 nm) and a 1 dm microcell. NMR experiments were performed on a Bruker DRX-600 spectrometer (Bruker BioSpin GmbH, Rheinstetten, Germany) equipped with a Bruker 5 mm TCI CryoProbe at 300 K. All 2D NMR spectra were acquired in methanol-*d*<sub>4</sub> (99.95%, Sigma-Aldrich), standard pulse sequences and phase cycling were used for DQF-COSY, HSQC, and HMBC spectra. HRESIMS spectra were acquired in the positive ion mode on a XL Orbitrap™ instrument (Thermo-Fisher). TLCs were performed on precoated Kieselgel 60 F<sub>254</sub> plates (Merck AG), and compounds were detected by spraying with a Ce(SO<sub>4</sub>)<sub>2</sub>/H<sub>2</sub>SO<sub>4</sub> solution. Column chromatography was performed over silica gel (70–220 mesh, Merck). Reversed-phase (RP) HPLC separations were conducted using a Shimadzu LC-20AT series pumping system equipped with a Shimadzu RID10A refractive index detector and a Shimadzu injector, using a C<sub>18</sub>  $\mu$ -Bondapak™ column (30 cm x 7.8 mm, 10  $\mu$ m, Waters–Milford) and a mobile phase consisting of MeOH-H<sub>2</sub>O mixtures at a flow rate of 2.5ml/min.

### *Plant material*

Leaves of *Psiadia punctulata* (DC.) Vatke (Asteraceae) were collected in Wadi Ghazal, Saudi Arabia, in June 2012 near Wadi Thee Ghazal about 25 km south of Taif City, Saudi Arabia (Coordinates: 21° 08' N 40° 22' E). The plant material was identified morphologically by Prof. Ammar Bader. A voucher specimen (SA/IT 2013/1) was deposited in the Laboratory of Pharmacognosy at *Umm Al-Qura University*, Saudi Arabia.

### *Extraction and isolation*

The exudate of *P. punctulata* (10.0 g) was obtained by dipping 201 g of fresh leaves into 2.1 L of dichloromethane for less than 30 sec, after which the leaves were dried at 40 °C. The exudate was dissolved in chloroform and separated on silica gel column, eluted with step gradients of CHCl<sub>3</sub>-MeOH (100:0, 90:10, 80:20, 70:30, 50:50 and 0:100). Fractions of 50 mL were collected, analysed by TLC and grouped into nine main fractions (A-I). Fraction B (322.0 mg) and was subjected to semi-preparative reversed phase HPLC (MeOH-H<sub>2</sub>O, 65:35) to yield compound **14** (50.0 mg, *t*<sub>R</sub> 11 min).



*ent*-Trachyloban-6 $\beta$ ,18,19-trihydroxy-2-one (**14**)

White substance;  $[\alpha]_D^{25}$ : -129° (c 0.26, CH<sub>3</sub>OH); <sup>1</sup>H NMR (CD<sub>3</sub>OD, 600 MHz) and <sup>13</sup>C NMR (CD<sub>3</sub>OD, 150 MHz), see Table 6S ; HRESIMS *m/z* 335.2216 [M+H]<sup>+</sup>, calcd. for C<sub>20</sub>H<sub>30</sub>O<sub>3</sub>, 335.2211.

**Table 10S.** <sup>1</sup>H and <sup>13</sup>C NMR data of compound **14** (CD<sub>3</sub>OD, 600 MHz,  $\delta$  in ppm and *J* in Hz in parenthesis)

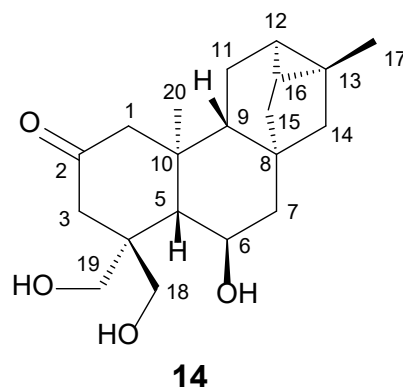

| Position  | $\delta_c$ | $\delta_H$                             | HMBC <sup>b</sup>   |
|-----------|------------|----------------------------------------|---------------------|
| <b>1</b>  | 53.0       | 1.93 <sup>a</sup> ; 2.21 d (16.0)      | 2, 5, 9, 10, 20     |
| <b>2</b>  | 213.4      | -                                      | -                   |
| <b>3</b>  | 45.7       | 2.35 <sup>a</sup> ; 2.41 d (16.3)      | 2, 4, 5, 18, 19     |
| <b>4</b>  | 44.7       | -                                      | -                   |
| <b>5</b>  | 54.4       | 1.59, d (11.0)                         | 6, 9, 10, 20, 18,19 |
| <b>6</b>  | 67.0       | 3.95, br dd (5.0,11.0)                 | -                   |
| <b>7</b>  | 48.5       | 1.73, dd (5.0,12.0), 1.39 <sup>a</sup> | 5, 6, 8             |
| <b>8</b>  | 41.8       | -                                      | -                   |
| <b>9</b>  | 52.5       | 1.40 <sup>a</sup>                      | 11, 20              |
| <b>10</b> | 43.0       | -                                      | -                   |
| <b>11</b> | 20.7       | 1.69 <sup>a</sup> ; 1.96 m             | 10, 12              |
| <b>12</b> | 20.0       | 0.66 br d (7.4)                        | -                   |
| <b>13</b> | 25.0       | 0.90 dd (7.7, 2.5)                     | 12, 14, 8           |
| <b>14</b> | 34.2       | 1.34 br d (11.7); 2.09, dd (11.8, 2.5) | 12                  |
| <b>15</b> | 52.1       | 1.35 <sup>a</sup> ; 1.48 <sup>a</sup>  | 7, 8, 9, 14, 16, 17 |
| <b>16</b> | 22.7       | -                                      | -                   |
| <b>17</b> | 20.7       | 1.16 s                                 | 12, 13, 15          |
| <b>18</b> | 31.4       | 3.72, d (11.0); .3.52, d (11.0)        | 3, 4, 5, 19         |
| <b>19</b> | 68.0       | 3.65 d (10.9); 3.95 d (10.9)           | 3, 4, 5, 18         |
| <b>20</b> | 17.4       | 1.13 s                                 | 1, 9, 10            |

<sup>a</sup>Overlapped signal. <sup>b</sup>HMBC correlations are from proton(s) stated to the indicate carbon(s). Assignments were confirmed by COSY, 1D-TOCSY and HSQC experiments.

### Measurements of $^1J_{\text{CH}}$ couplings in **14**

$^1J_{\text{CH}}$  Couplings for **14** were measured in DMSO- $d_6$  on a Bruker 600 MHz spectrometer equipped with a 1.7 mm TXI MicroCryoProbe<sup>TM</sup> using a  $J$ -resolved F1-iINEPT HSQC pulse sequence with  $^1J_{\text{CH}}$  optimized to 145 Hz. Four scans were accumulated for each of the 512  $t_1$  increments with the number of data points in  $t_2$  set to 2048. The spectral window was 2705 Hz in F2 and 400 Hz ( $J$ -resolved) in F1 giving a FID resolution of 2.6 and 1.5 Hz, respectively. The recycle delay was set to 3 s, giving an overall experimental time of 2 h 8 min. Prior to Fourier-transformation, the data set was zero-filled to 4096 in F2, 2048 in F1; a  $\pi/2$ -shifted sine-squared window function was applied in both dimensions.

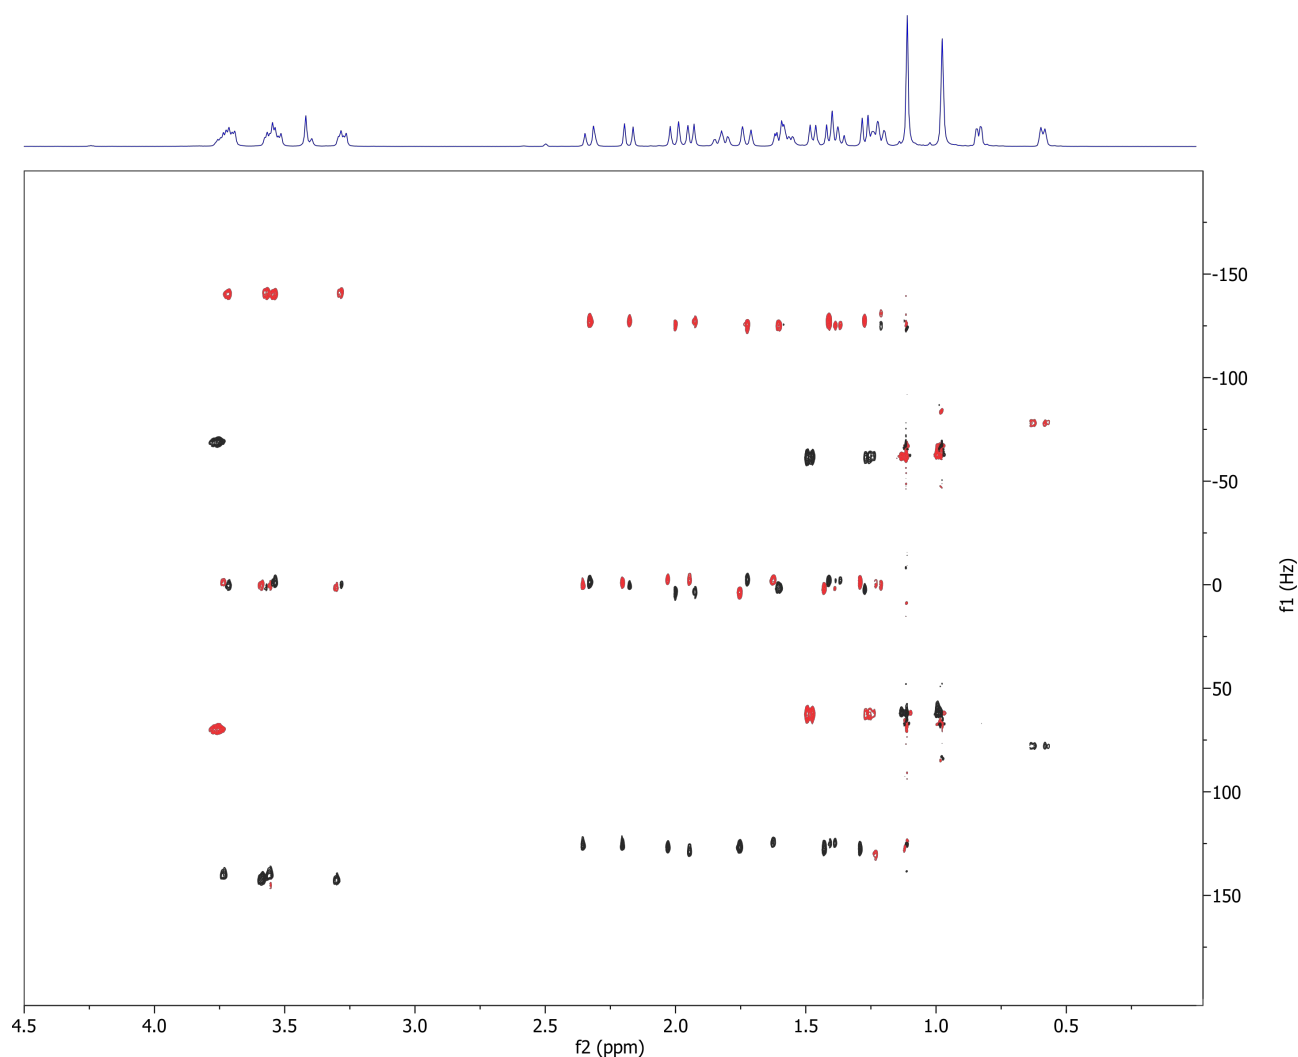

**Figure 8S.**  $J$ -resolved F1-iINEPT HSQC spectrum of **14** in DMSO- $d_6$  at 25 °C

### Stereochemical analysis of **14**

Relative stereochemistry in **14** was determined using ROESY data as shown in Figure 8S below. The ROESY spectrum of **14** was acquired in DMSO- $d_6$  on a Bruker 600 MHz spectrometer equipped with a 1.7 mm TXI MicroCryoProbe™. Eight scans were accumulated for each of the 512  $t_1$  increments with the number of data points in  $t_2$  set to 4096. Spectral window was 3597.1 Hz in F2 and F1 dimensions, respectively. The mixing time was set to 400 ms, the recycle delay was set to 1.5 s, giving an overall experimental time of 2 h 51 min. Prior to Fourier-transformation, the data set was zero-filled to 4096 points in F2 and 2048 points in F1; a  $\pi/2$ -shifted sine-squared window function was applied in both dimensions.

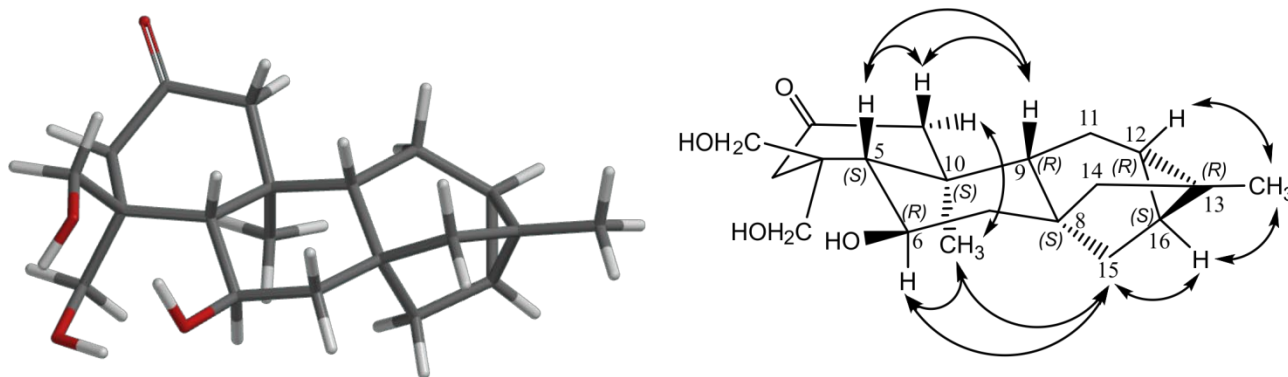

**Figure 9S.** Left: lowest energy conformation of **14**. Right: ChemDraw structure of **14** with the most relevant ROE correlations represented by double-headed arrows.

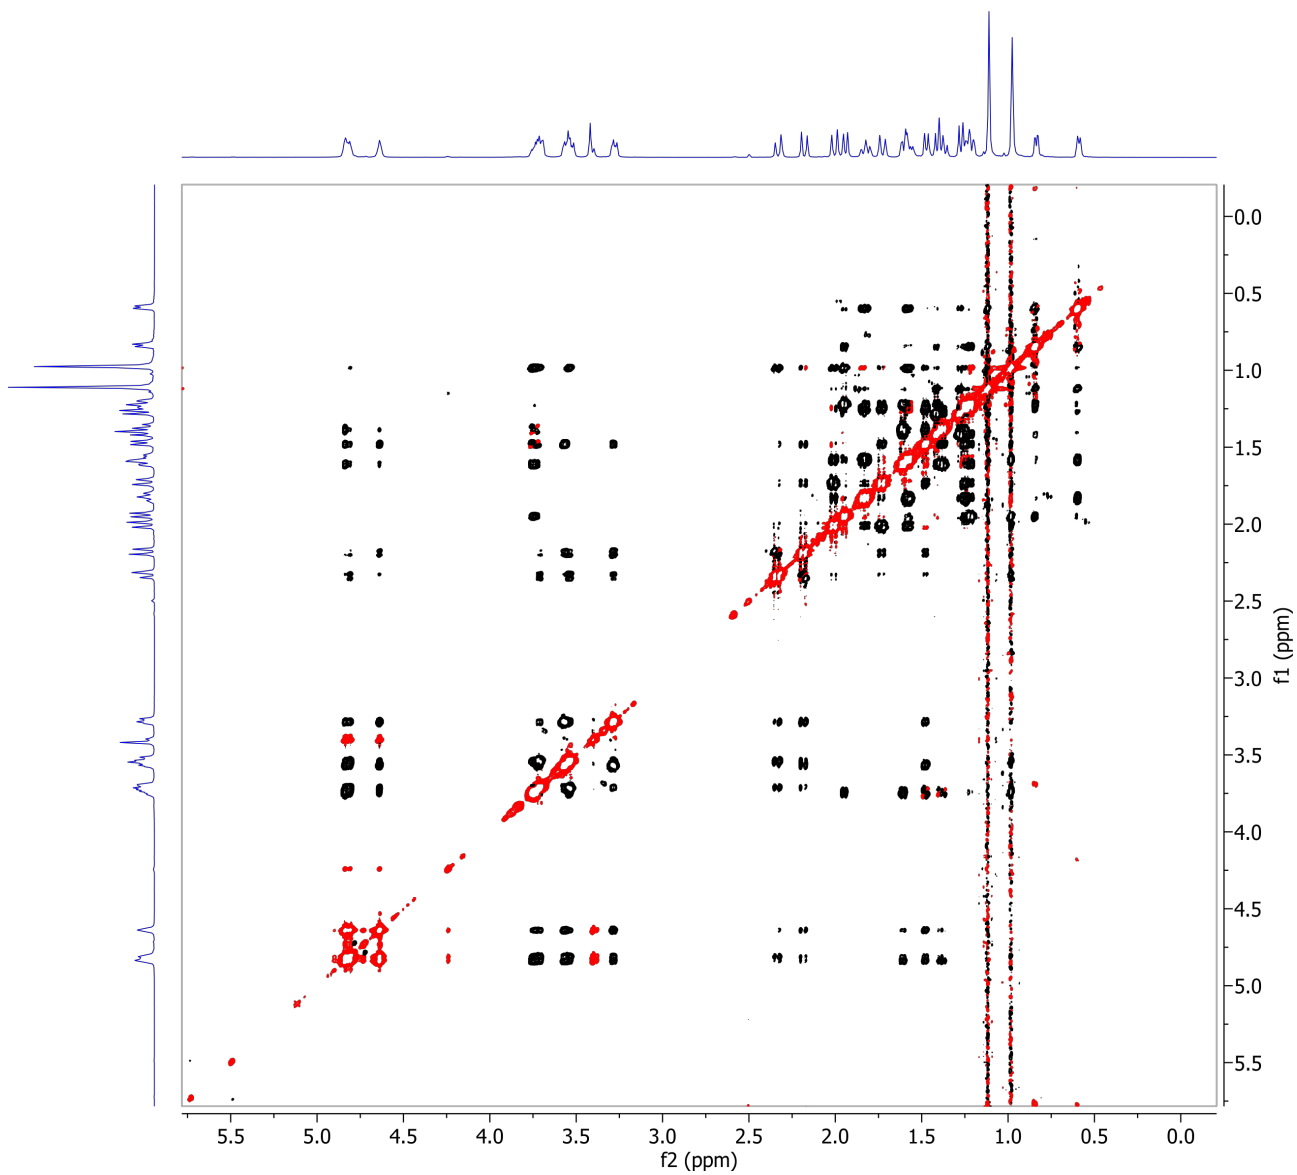

**Figure 10S.** ROESY spectrum of **14** in DMSO-d<sub>6</sub> at 25 °C

**Table 11S.** RMSD, max\_d, correlation coefficients *R* and number of analyzed conformations for diterpene **14** and its isomers **15-19**.

|                        | Structures |           |           |           |           |           |
|------------------------|------------|-----------|-----------|-----------|-----------|-----------|
|                        | <b>14</b>  | <b>15</b> | <b>16</b> | <b>17</b> | <b>18</b> | <b>19</b> |
| RMSD, Hz               | 2.03       | 3.86      | 2.68      | 2.62      | 2.69      | 2.19      |
| max_d, Hz              | 3.78       | 11.32     | 6.42      | 5.79      | 5.86      | 4.24      |
| <i>R</i>               | 0.9972     | 0.9596    | 0.9860    | 0.9851    | 0.9886    | 0.9954    |
| # of conf <sup>a</sup> | 111(9)     | 72(5)     | 146(11)   | 207(4)    | 125(8)    | 117(10)   |

<sup>a</sup> Number of conformations generated by Spartan'16 program<sup>[1]</sup> using MMFF force field with 10 kcal/mol cutoff energy. These ensembles of conformations were subsequently optimized at the B3LYP/6-31+G(d,p) level using Gaussian16 program.<sup>[4]</sup> The number in parenthesis is the final number of conformations with weights >1% which were used for *J*-coupling analysis at the B3LYP/6-31G(d,p)//mPW1PW/cc-pVTZ model chemistry and "mixed" method<sup>[6]</sup> using Gaussian16 program.

**Table 12S.**  $^1J_{CH}$  Couplings for the nine lowest energy conformations of **14**, conformational weights, averaged  $^1J_{CH}$  couplings, RMSD and maximum  $J$ -coupling deviation (max\_d) for **14**

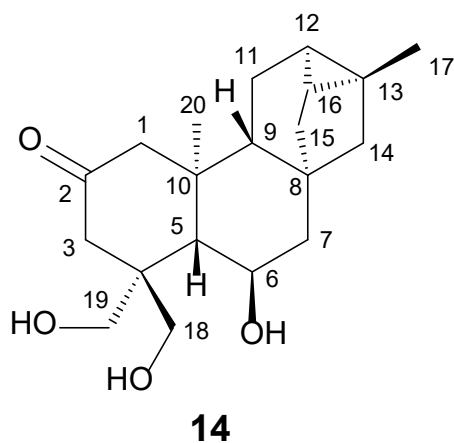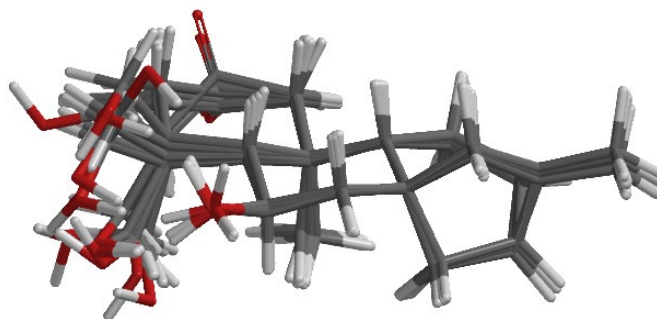

| Proton     | Exp.  | 14-1  | 14-2  | 14-3  | 14-4  | 14-5  | 14-6  | 14-7  | 14-8  | 14-9  | Averaged |
|------------|-------|-------|-------|-------|-------|-------|-------|-------|-------|-------|----------|
| H1b        | 124.1 | 125.7 | 126.3 | 124.5 | 123.0 | 123.5 | 130.4 | 123.3 | 124.4 | 124.4 | 125.4    |
| H1a        | 129.4 | 129.7 | 129.1 | 136.3 | 136.5 | 136.1 | 125.0 | 136.1 | 136.9 | 136.3 | 132.0    |
| H3a        | 128.6 | 134.0 | 134.8 | 128.0 | 123.4 | 120.7 | 138.9 | 120.7 | 119.2 | 123.7 | 130.3    |
| H3b        | 126.0 | 123.2 | 122.3 | 134.1 | 135.8 | 140.9 | 122.6 | 140.9 | 136.3 | 138.6 | 128.6    |
| H5         | 124.5 | 123.7 | 124.5 | 125.8 | 122.8 | 124.8 | 123.9 | 122.6 | 124.0 | 125.5 | 124.2    |
| H6         | 139.1 | 141.4 | 137.8 | 142.2 | 149.3 | 141.8 | 135.7 | 145.2 | 141.5 | 135.8 | 141.1    |
| H7b        | 123.2 | 125.0 | 125.4 | 125.3 | 126.3 | 127.2 | 125.3 | 120.5 | 125.0 | 125.8 | 125.1    |
| H7a        | 127.1 | 132.3 | 131.9 | 131.1 | 124.8 | 125.2 | 131.4 | 131.4 | 132.6 | 131.5 | 131.0    |
| H9         | 125.7 | 125.9 | 126.0 | 126.6 | 125.9 | 126.2 | 126.6 | 125.8 | 125.7 | 126.3 | 126.1    |
| H11b       | 124.2 | 124.8 | 124.7 | 125.1 | 126.0 | 125.9 | 124.8 | 125.9 | 125.0 | 125.0 | 125.1    |
| H11a       | 127.1 | 129.2 | 129.1 | 128.8 | 129.0 | 129.4 | 128.6 | 129.3 | 129.2 | 128.7 | 129.1    |
| H12        | 156.1 | 158.0 | 157.9 | 158.0 | 158.2 | 158.6 | 157.7 | 158.6 | 158.5 | 157.8 | 158.1    |
| H14b       | 126.2 | 128.1 | 128.1 | 127.8 | 127.3 | 127.3 | 128.1 | 127.5 | 128.1 | 128.1 | 127.9    |
| H14a       | 130.1 | 131.7 | 131.8 | 131.7 | 131.9 | 132.2 | 131.7 | 131.8 | 131.6 | 131.7 | 131.8    |
| H15b       | 125.8 | 128.5 | 128.6 | 128.2 | 127.4 | 127.6 | 128.5 | 128.2 | 129.0 | 128.5 | 128.4    |
| H15a       | 130.4 | 131.8 | 131.6 | 132.0 | 133.8 | 132.7 | 131.5 | 132.8 | 131.4 | 131.9 | 132.0    |
| H16        | 165.3 | 168.5 | 168.5 | 168.1 | 168.7 | 169.0 | 168.1 | 169.1 | 168.9 | 167.9 | 168.5    |
| H18b       | 141.6 | 142.5 | 143.7 | 141.5 | 144.6 | 147.1 | 140.6 | 147.6 | 143.1 | 146.2 | 143.3    |
| H18a       | 142.8 | 145.4 | 143.5 | 141.6 | 139.2 | 140.1 | 152.2 | 137.4 | 146.2 | 147.2 | 143.8    |
| H19b       | 140.0 | 139.8 | 144.8 | 146.1 | 145.1 | 138.1 | 144.3 | 138.2 | 141.4 | 143.7 | 142.2    |
| H19a       | 141.2 | 144.5 | 143.6 | 137.5 | 137.8 | 143.9 | 145.8 | 144.4 | 144.3 | 143.1 | 142.8    |
| Met17      | 124.4 | 126.4 | 126.4 | 126.3 | 126.4 | 126.5 | 126.3 | 126.5 | 126.4 | 126.3 | 126.4    |
| Met20      | 124.9 | 126.6 | 126.5 | 127.2 | 128.4 | 127.6 | 126.3 | 127.8 | 127.4 | 127.3 | 127.0    |
| Weights, % |       | 35.3  | 18.0  | 15.2  | 6.5   | 6.4   | 5.8   | 5.7   | 3.7   | 3.4   |          |
| RMSD, Hz   |       |       |       |       |       |       |       |       |       |       | 2.03     |
| max_d, Hz  |       |       |       |       |       |       |       |       |       |       | 3.89     |

**Table 13S.**  $^1J_{CH}$  Couplings for the five lowest energy conformations of **15**, conformational weights, averaged $^1J_{CH}$  couplings, RMSD and maximum  $J$ -coupling deviation (max\_d) for **15**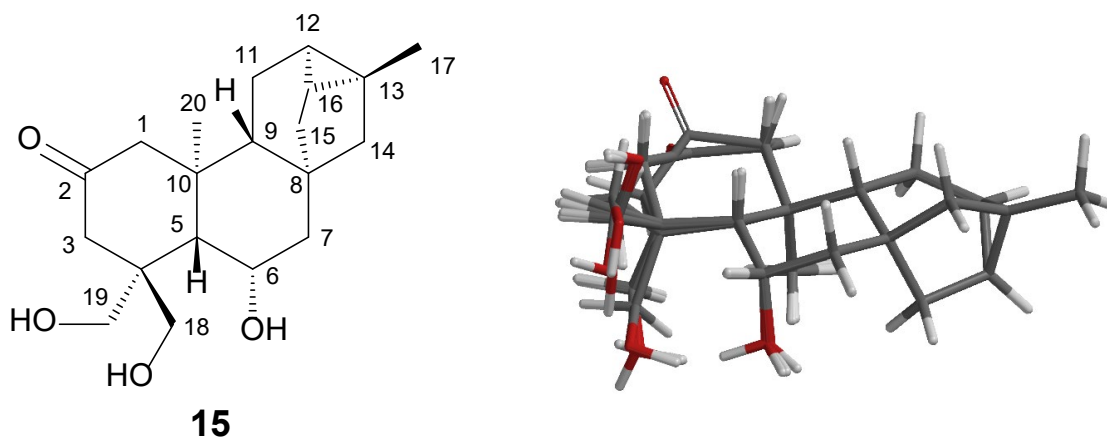

| Proton            | Exp.  | 15-1  | 15-2  | 15-3  | 15-4  | 15-5  | Averaged |
|-------------------|-------|-------|-------|-------|-------|-------|----------|
| <b>H1b</b>        | 124.1 | 122.9 | 122.8 | 123.0 | 128.2 | 123.7 | 123.0    |
| <b>H1a</b>        | 129.4 | 136.7 | 137.0 | 136.1 | 126.8 | 136.2 | 136.6    |
| <b>H3a</b>        | 128.6 | 135.9 | 135.0 | 134.2 | 122.2 | 132.9 | 123.4    |
| <b>H3b</b>        | 126.0 | 123.0 | 123.1 | 126.3 | 134.7 | 129.4 | 135.6    |
| <b>H5</b>         | 124.5 | 118.2 | 117.4 | 121.5 | 120.5 | 121.5 | 118.3    |
| <b>H6</b>         | 139.1 | 151.2 | 142.5 | 144.0 | 151.4 | 139.1 | 150.4    |
| <b>H7b</b>        | 123.2 | 123.0 | 120.5 | 124.1 | 124.6 | 121.8 | 125.9    |
| <b>H7a</b>        | 127.1 | 125.6 | 130.9 | 124.9 | 124.5 | 130.4 | 122.9    |
| <b>H9</b>         | 125.7 | 125.3 | 124.5 | 125.7 | 125.9 | 125.4 | 125.2    |
| <b>H11b</b>       | 124.2 | 126.0 | 125.3 | 126.1 | 125.7 | 125.2 | 125.9    |
| <b>H11a</b>       | 127.1 | 128.6 | 127.8 | 128.5 | 128.8 | 127.9 | 128.5    |
| <b>H12</b>        | 156.1 | 158.0 | 157.3 | 157.9 | 158.0 | 157.1 | 158.0    |
| <b>H14b</b>       | 126.2 | 127.2 | 127.5 | 126.9 | 127.2 | 127.4 | 127.2    |
| <b>H14a</b>       | 130.1 | 131.4 | 130.3 | 131.5 | 131.9 | 130.7 | 131.3    |
| <b>H15b</b>       | 125.8 | 126.6 | 129.5 | 126.0 | 125.6 | 129.1 | 135.9    |
| <b>H15a</b>       | 130.4 | 135.9 | 136.9 | 136.1 | 135.0 | 136.4 | 126.7    |
| <b>H16</b>        | 165.3 | 168.2 | 167.2 | 168.1 | 168.3 | 166.9 | 168.1    |
| <b>H18b</b>       | 141.6 | 142.7 | 139.7 | 141.5 | 143.4 | 140.7 | 142.5    |
| <b>H18a</b>       | 142.8 | 143.4 | 147.9 | 141.5 | 142.3 | 145.7 | 143.6    |
| <b>H19b</b>       | 140.0 | 140.5 | 140.8 | 146.7 | 139.9 | 145.0 | 142.1    |
| <b>H19a</b>       | 141.2 | 142.1 | 143.0 | 139.1 | 144.1 | 138.5 | 140.7    |
| <b>Met17</b>      | 124.4 | 126.3 | 126.0 | 126.3 | 126.4 | 126.0 | 126.3    |
| <b>Met20</b>      | 124.9 | 128.1 | 128.1 | 127.9 | 127.0 | 127.6 | 128.0    |
| <b>Weights, %</b> |       | 89.2  | 5.1   | 3.1   | 1.6   | 1.0   |          |
| <b>RMSD, Hz</b>   |       |       |       |       |       |       | 3.86     |
| <b>max_d, Hz</b>  |       |       |       |       |       |       | 11.32    |

**Table 14S.**  $^1J_{\text{CH}}$  Couplings for the eleven lowest energy conformations of **16**, conformational weights, averaged  $^1J_{\text{CH}}$  couplings, RMSD and maximum  $J$ -coupling deviation (max\_d) for **16**

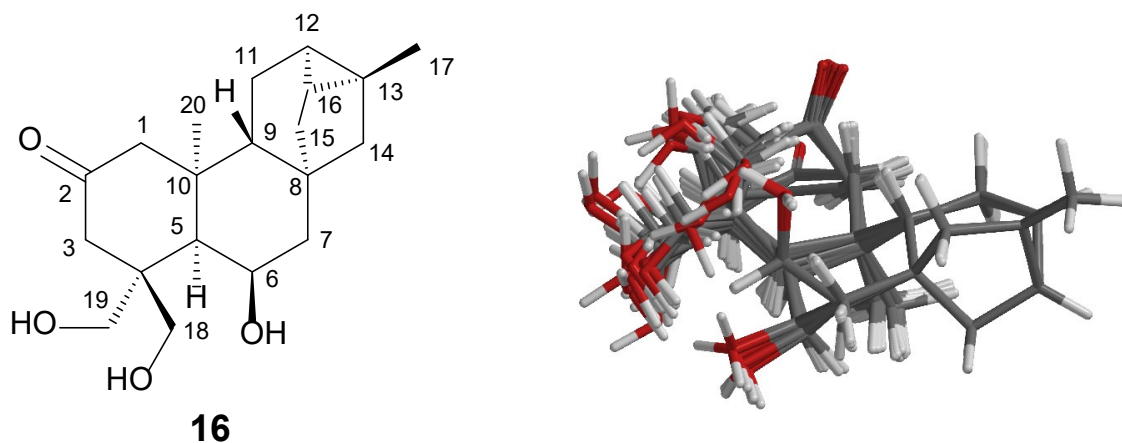

| Proton     | Exp.  | 16-1  | 16-2  | 16-3  | 16-4  | 16-5  | 16-6  | 16-7  | 16-8  | 16-9  | 16-10 | 16-11 | Averaged |
|------------|-------|-------|-------|-------|-------|-------|-------|-------|-------|-------|-------|-------|----------|
| H1b        | 124.1 | 122.6 | 137.1 | 137.3 | 134.7 | 122.1 | 122.3 | 134.0 | 123.7 | 122.7 | 136.5 | 136.2 | 129.1    |
| H1a        | 129.4 | 133.7 | 124.9 | 124.7 | 122.6 | 134.4 | 133.9 | 124.5 | 137.2 | 134.2 | 123.1 | 124.1 | 129.5    |
| H3a        | 128.6 | 133.4 | 135.8 | 136.2 | 124.4 | 129.4 | 137.8 | 125.0 | 124.8 | 132.5 | 137.0 | 141.7 | 132.7    |
| H3b        | 126.0 | 122.8 | 122.5 | 121.2 | 129.7 | 123.5 | 121.6 | 129.7 | 131.2 | 123.5 | 124.6 | 122.8 | 123.9    |
| H5         | 124.5 | 122.2 | 125.8 | 125.1 | 128.8 | 120.2 | 120.9 | 132.7 | 124.5 | 121.4 | 125.3 | 126.3 | 124.3    |
| H6         | 139.1 | 153.3 | 143.5 | 142.8 | 138.9 | 138.1 | 144.8 | 139.3 | 137.6 | 143.6 | 140.8 | 139.7 | 145.5    |
| H7b        | 123.2 | 124.4 | 129.2 | 130.3 | 130.9 | 121.6 | 124.4 | 125.7 | 123.6 | 121.3 | 121.9 | 124.3 | 126.3    |
| H7a        | 127.1 | 126.2 | 126.5 | 125.1 | 125.4 | 131.5 | 126.1 | 127.2 | 134.8 | 131.0 | 135.4 | 128.1 | 127.1    |
| H9         | 125.7 | 129.8 | 124.6 | 124.7 | 123.6 | 130.8 | 129.1 | 123.9 | 128.0 | 132.1 | 125.6 | 126.0 | 127.2    |
| H11b       | 124.2 | 125.0 | 124.3 | 124.3 | 125.3 | 124.1 | 125.3 | 125.7 | 125.5 | 123.9 | 124.6 | 124.6 | 124.8    |
| H11a       | 127.1 | 129.7 | 132.0 | 132.1 | 130.3 | 129.0 | 130.1 | 130.5 | 128.6 | 128.8 | 131.0 | 132.3 | 130.5    |
| H12        | 156.1 | 158.8 | 158.4 | 158.3 | 158.5 | 158.1 | 159.0 | 158.5 | 157.9 | 157.7 | 158.4 | 158.6 | 158.5    |
| H14b       | 126.2 | 126.1 | 127.8 | 127.8 | 127.6 | 126.5 | 125.9 | 127.2 | 127.1 | 126.3 | 127.5 | 127.0 | 126.9    |
| H14a       | 130.1 | 132.8 | 132.1 | 132.2 | 131.7 | 137.6 | 132.9 | 131.9 | 134.1 | 137.7 | 133.7 | 133.3 | 132.9    |
| H15b       | 125.8 | 128.2 | 128.7 | 128.8 | 128.7 | 128.2 | 128.1 | 127.6 | 127.5 | 128.0 | 128.1 | 127.8 | 128.3    |
| H15a       | 130.4 | 132.5 | 131.1 | 131.1 | 131.0 | 131.4 | 132.9 | 131.6 | 131.2 | 131.0 | 130.3 | 131.2 | 131.7    |
| H16        | 165.3 | 169.8 | 168.9 | 168.9 | 169.1 | 168.9 | 170.2 | 169.1 | 168.4 | 168.4 | 169.0 | 169.1 | 169.3    |
| H18b       | 141.6 | 138.7 | 143.7 | 142.2 | 140.2 | 141.6 | 142.0 | 139.3 | 144.1 | 139.7 | 144.4 | 146.5 | 141.1    |
| H18a       | 142.8 | 142.9 | 143.8 | 146.5 | 142.3 | 146.1 | 138.7 | 141.7 | 142.4 | 144.3 | 140.7 | 140.2 | 143.3    |
| H19b       | 140.0 | 138.9 | 144.5 | 141.3 | 139.7 | 145.2 | 139.3 | 138.9 | 141.4 | 145.0 | 142.9 | 141.2 | 141.2    |
| H19a       | 141.2 | 143.0 | 143.1 | 144.9 | 143.5 | 142.0 | 144.7 | 143.1 | 138.2 | 141.1 | 140.8 | 143.9 | 143.0    |
| Met17      | 124.4 | 126.4 | 126.4 | 126.4 | 126.5 | 126.2 | 126.5 | 126.5 | 126.3 | 126.1 | 126.4 | 126.5 | 126.4    |
| Met20      | 124.9 | 127.0 | 127.4 | 127.4 | 127.1 | 127.0 | 127.1 | 127.1 | 127.6 | 126.6 | 127.2 | 127.1 | 127.2    |
| Weights, % |       | 33.8  | 21.2  | 10.6  | 7.8   | 6.7   | 5.7   | 5.4   | 4.8   | 1.6   | 1.3   | 1.1   |          |
| RMSD, Hz   |       |       |       |       |       |       |       |       |       |       |       |       | 2.68     |
| max_d, Hz  |       |       |       |       |       |       |       |       |       |       |       |       | 6.42     |



**Table 15S.**  $^1J_{CH}$  Couplings for the four lowest energy conformations of **17**, conformational weights, averaged

$^1J_{CH}$  couplings, RMSD and maximum  $J$ -coupling deviation (max\_d) for **17**

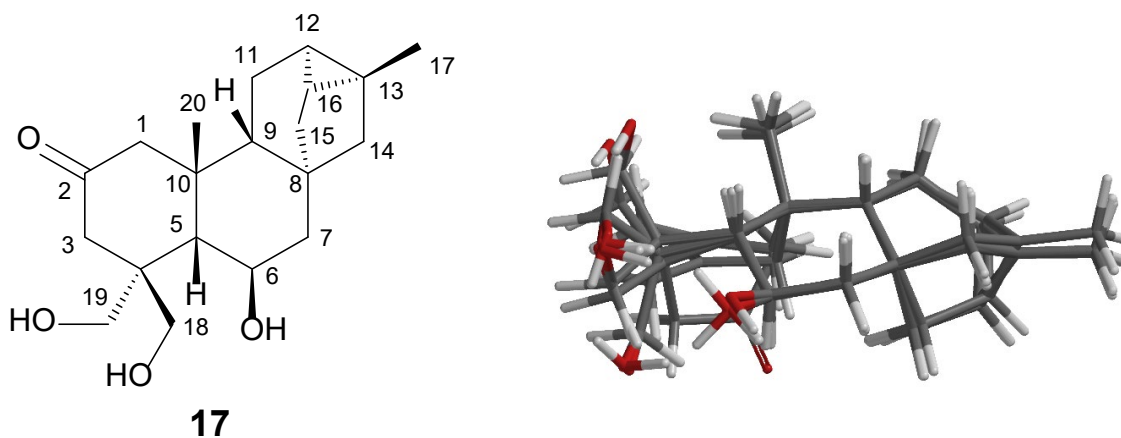

| Proton            | Exp.  | 17-1  | 17-2  | 17-3  | 17-4  | Averaged |
|-------------------|-------|-------|-------|-------|-------|----------|
| H1b               | 124.1 | 121.8 | 121.8 | 121.6 | 134.9 | 122.0    |
| H1a               | 129.4 | 135.7 | 134.9 | 134.9 | 120.9 | 135.2    |
| H3a               | 128.6 | 134.2 | 124.6 | 125.6 | 123.3 | 130.3    |
| H3b               | 126.0 | 120.6 | 131.9 | 131.5 | 131.2 | 125.2    |
| H5                | 124.5 | 132.0 | 127.1 | 128.2 | 131.8 | 130.2    |
| H6                | 139.1 | 139.1 | 139.5 | 136.1 | 138.4 | 138.8    |
| H7b               | 123.2 | 126.9 | 126.0 | 126.0 | 126.8 | 126.5    |
| H7a               | 127.1 | 124.7 | 132.5 | 132.2 | 125.5 | 127.8    |
| H9                | 125.7 | 126.4 | 126.3 | 126.3 | 126.8 | 126.3    |
| H11b              | 124.2 | 126.4 | 126.0 | 125.9 | 126.6 | 126.2    |
| H11a              | 127.1 | 129.8 | 128.9 | 128.9 | 128.8 | 129.4    |
| H12               | 156.1 | 158.5 | 158.2 | 158.1 | 158.0 | 158.3    |
| H14b              | 126.2 | 127.0 | 128.3 | 128.3 | 127.5 | 127.5    |
| H14a              | 130.1 | 132.4 | 131.4 | 131.3 | 131.2 | 132.0    |
| H15b              | 125.8 | 127.6 | 128.8 | 128.8 | 126.6 | 128.1    |
| H15a              | 130.4 | 131.2 | 130.4 | 130.2 | 135.9 | 130.9    |
| H16               | 165.3 | 169.1 | 168.7 | 168.5 | 168.8 | 168.9    |
| H18b              | 141.6 | 143.7 | 138.0 | 142.7 | 145.1 | 142.0    |
| H18a              | 142.8 | 142.8 | 145.7 | 144.7 | 142.1 | 143.8    |
| H19b              | 140.0 | 138.2 | 140.6 | 142.2 | 139.5 | 139.4    |
| H19a              | 141.2 | 145.5 | 145.9 | 144.4 | 141.7 | 145.4    |
| Met17             | 124.4 | 126.5 | 126.4 | 126.4 | 126.3 | 126.4    |
| Met20             | 124.9 | 128.7 | 127.1 | 127.0 | 128.7 | 128.1    |
| <b>Weights, %</b> |       | 58.0  | 26.6  | 14.1  | 1.2   |          |
| <b>RMSD, Hz</b>   |       |       |       |       |       | 2.62     |
| <b>max_d, Hz</b>  |       |       |       |       |       | 5.79     |

**Table 16S.**  $^1J_{\text{CH}}$  Couplings for the eight lowest energy conformations of **18**, conformational weights, averaged

$^1J_{\text{CH}}$  couplings, RMSD and maximum  $J$ -coupling deviation (max\_d) for **18**

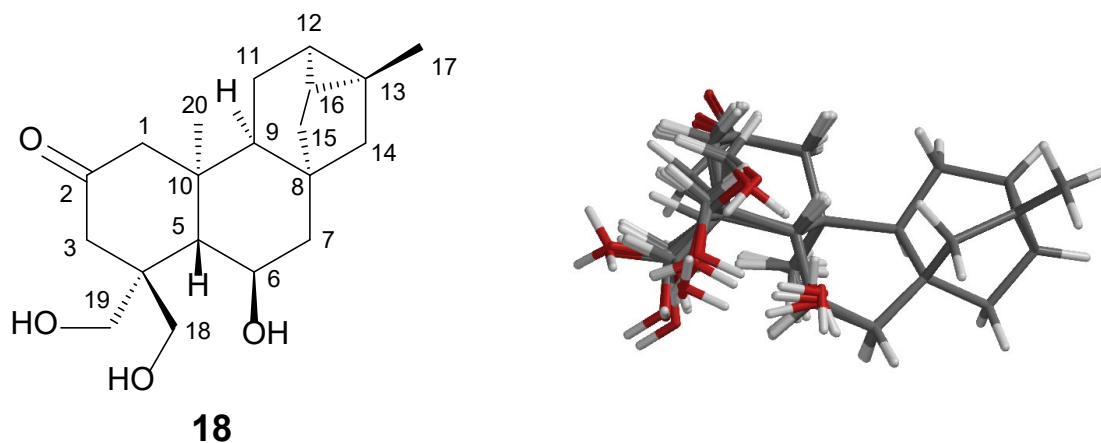

| Proton     | Exp.  | 18-1  | 18-2  | 18-3  | 18-4  | 18-5  | 18-6  | 18-7  | 18-8  | Averaged |
|------------|-------|-------|-------|-------|-------|-------|-------|-------|-------|----------|
| H1b        | 124.1 | 122.2 | 124.0 | 124.6 | 124.7 | 123.9 | 122.2 | 124.5 | 123.6 | 123.3    |
| H1a        | 129.4 | 134.7 | 135.8 | 135.5 | 135.9 | 135.6 | 134.5 | 135.7 | 135.2 | 135.3    |
| H3a        | 128.6 | 124.0 | 135.9 | 138.2 | 132.6 | 140.1 | 123.5 | 135.1 | 133.6 | 130.4    |
| H3b        | 126.0 | 130.9 | 123.3 | 124.4 | 125.8 | 122.1 | 131.6 | 126.5 | 129.8 | 127.2    |
| H5         | 124.5 | 124.1 | 123.4 | 126.0 | 126.0 | 124.7 | 124.3 | 125.0 | 123.5 | 124.2    |
| H6         | 139.1 | 143.0 | 151.7 | 135.6 | 136.0 | 142.7 | 139.1 | 142.9 | 149.9 | 144.3    |
| H7b        | 123.2 | 122.7 | 125.2 | 122.2 | 122.5 | 124.8 | 122.5 | 122.3 | 123.2 | 123.5    |
| H7a        | 127.1 | 131.8 | 124.4 | 131.8 | 131.9 | 124.4 | 131.7 | 131.6 | 126.2 | 129.1    |
| H9         | 125.7 | 128.8 | 128.9 | 128.4 | 128.6 | 128.8 | 128.7 | 128.4 | 128.5 | 128.8    |
| H11b       | 124.2 | 124.6 | 124.4 | 124.0 | 123.8 | 124.7 | 124.4 | 123.8 | 124.8 | 124.4    |
| H11a       | 127.1 | 131.0 | 131.7 | 130.9 | 130.9 | 131.8 | 130.9 | 130.8 | 131.3 | 131.3    |
| H12        | 156.1 | 159.7 | 159.8 | 159.2 | 159.2 | 159.9 | 159.5 | 159.1 | 159.5 | 159.6    |
| H14b       | 126.2 | 130.3 | 128.5 | 131.7 | 131.7 | 128.1 | 131.1 | 132.2 | 129.6 | 129.9    |
| H14a       | 130.1 | 129.3 | 132.9 | 131.6 | 131.4 | 132.9 | 129.8 | 132.5 | 133.2 | 131.0    |
| H15b       | 125.8 | 128.0 | 127.1 | 127.9 | 128.0 | 127.0 | 128.0 | 127.9 | 127.0 | 127.7    |
| H15a       | 130.4 | 133.8 | 134.3 | 133.3 | 133.4 | 134.3 | 133.5 | 133.2 | 133.8 | 133.9    |
| H16        | 165.3 | 167.7 | 167.6 | 166.8 | 166.9 | 167.8 | 167.4 | 166.6 | 167.0 | 167.5    |
| H18b       | 141.6 | 144.5 | 138.9 | 142.0 | 142.4 | 143.7 | 143.0 | 139.4 | 136.3 | 142.2    |
| H18a       | 142.8 | 140.3 | 144.3 | 143.7 | 146.0 | 138.3 | 144.9 | 145.6 | 144.0 | 142.4    |
| H19b       | 140.0 | 143.7 | 140.1 | 145.7 | 145.9 | 139.7 | 142.8 | 146.2 | 142.3 | 142.7    |
| H19a       | 141.2 | 141.6 | 144.2 | 146.7 | 143.7 | 147.7 | 143.7 | 141.9 | 142.1 | 143.4    |
| Met17      | 124.4 | 126.5 | 126.4 | 126.2 | 126.2 | 126.4 | 126.4 | 126.1 | 126.2 | 126.4    |
| Met20      | 124.9 | 126.7 | 127.6 | 126.8 | 126.9 | 127.2 | 126.6 | 126.9 | 127.1 | 127.0    |
| Weights, % |       | 41.9  | 30.0  | 8.5   | 7.8   | 5.2   | 5.0   | 0.8   | 0.7   |          |
| RMSD, Hz   |       |       |       |       |       |       |       |       |       | 2.69     |
| max_d, Hz  |       |       |       |       |       |       |       |       |       | 5.86     |

**Table 17S.**  $^1J_{CH}$  Couplings for the ten lowest energy conformations of **19**, conformational weights, averaged  $^1J_{CH}$  couplings, RMSD and maximum  $J$ -coupling deviation (max\_d) for **19**

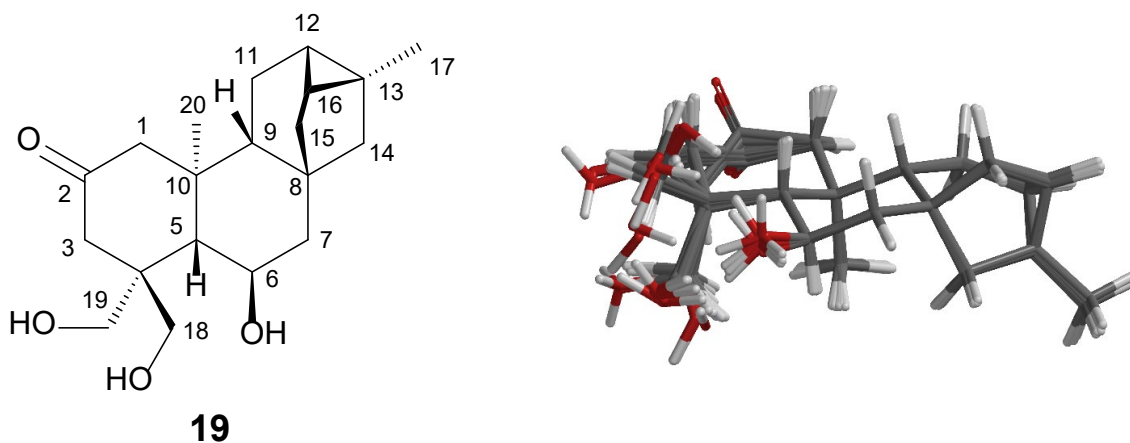

| Proton            | Exp.  | 19-1  | 19-2  | 19-3  | 19-4  | 19-5  | 19-6  | 19-7  | 19-8  | 19-9  | 19-10 | Averaged |
|-------------------|-------|-------|-------|-------|-------|-------|-------|-------|-------|-------|-------|----------|
| <b>H1b</b>        | 124.1 | 126.2 | 126.7 | 124.6 | 123.5 | 129.8 | 124.5 | 124.4 | 124.7 | 123.7 | 125.9 | 125.9    |
| <b>H1a</b>        | 129.4 | 129.3 | 128.8 | 136.2 | 136.1 | 125.4 | 137.0 | 136.2 | 136.7 | 136.3 | 129.2 | 131.3    |
| <b>H3a</b>        | 128.6 | 134.1 | 135.0 | 127.9 | 120.7 | 138.7 | 119.4 | 123.7 | 125.5 | 126.8 | 139.6 | 131.6    |
| <b>H3b</b>        | 126.0 | 123.4 | 122.4 | 134.1 | 140.8 | 122.4 | 136.3 | 138.6 | 132.7 | 134.7 | 120.6 | 127.3    |
| <b>H5</b>         | 124.5 | 123.8 | 124.6 | 125.9 | 124.8 | 123.9 | 124.0 | 125.4 | 125.3 | 124.8 | 124.4 | 124.5    |
| <b>H6</b>         | 139.1 | 141.3 | 137.8 | 142.1 | 141.7 | 135.5 | 141.4 | 135.8 | 136.2 | 147.5 | 141.0 | 140.1    |
| <b>H7b</b>        | 123.2 | 125.0 | 125.4 | 125.3 | 127.2 | 125.3 | 125.1 | 125.8 | 125.8 | 126.5 | 126.9 | 125.3    |
| <b>H7a</b>        | 127.1 | 132.4 | 131.9 | 131.0 | 125.1 | 131.4 | 132.5 | 131.4 | 131.5 | 125.1 | 125.2 | 131.3    |
| <b>H9</b>         | 125.7 | 126.3 | 126.4 | 126.8 | 126.4 | 126.6 | 126.1 | 126.5 | 126.5 | 126.6 | 126.5 | 126.5    |
| <b>H11b</b>       | 124.2 | 124.8 | 124.7 | 125.1 | 125.9 | 124.7 | 125.1 | 124.9 | 124.8 | 126.0 | 125.5 | 124.9    |
| <b>H11a</b>       | 127.1 | 129.1 | 129.1 | 128.8 | 129.4 | 128.7 | 129.2 | 128.7 | 128.6 | 129.0 | 129.5 | 129.0    |
| <b>H12</b>        | 156.1 | 158.1 | 158.1 | 157.8 | 158.5 | 157.6 | 158.3 | 157.7 | 157.8 | 158.2 | 158.4 | 158.0    |
| <b>H14b</b>       | 126.2 | 127.6 | 127.6 | 127.3 | 126.6 | 127.6 | 128.0 | 127.5 | 127.6 | 126.4 | 126.7 | 127.5    |
| <b>H14a</b>       | 130.1 | 131.0 | 130.9 | 131.3 | 132.1 | 130.8 | 130.8 | 131.2 | 131.3 | 132.7 | 131.7 | 131.1    |
| <b>H15b</b>       | 125.8 | 129.1 | 129.1 | 128.8 | 128.3 | 129.0 | 129.0 | 129.2 | 129.2 | 128.2 | 128.3 | 129.0    |
| <b>H15a</b>       | 130.4 | 132.6 | 132.6 | 132.5 | 132.9 | 132.5 | 132.5 | 132.5 | 132.4 | 132.7 | 133.1 | 132.6    |
| <b>H16</b>        | 165.3 | 169.3 | 169.2 | 168.7 | 169.4 | 168.7 | 168.9 | 168.7 | 168.7 | 169.3 | 169.6 | 169.1    |
| <b>H18b</b>       | 141.6 | 139.8 | 144.7 | 146.1 | 138.1 | 144.3 | 141.6 | 143.7 | 146.2 | 147.3 | 138.0 | 142.4    |
| <b>H18a</b>       | 142.8 | 144.5 | 143.6 | 137.5 | 143.9 | 145.9 | 144.2 | 143.0 | 143.4 | 137.9 | 147.3 | 143.1    |
| <b>H19b</b>       | 140.0 | 142.5 | 143.7 | 141.6 | 147.1 | 140.5 | 143.1 | 146.2 | 143.8 | 140.5 | 142.1 | 142.9    |
| <b>H19a</b>       | 141.2 | 145.5 | 143.6 | 141.6 | 140.1 | 152.1 | 146.1 | 147.2 | 147.3 | 143.4 | 145.6 | 144.6    |
| <b>Met17</b>      | 124.4 | 126.4 | 126.3 | 126.2 | 126.5 | 126.2 | 126.4 | 126.2 | 126.2 | 126.4 | 126.5 | 126.3    |
| <b>Met20</b>      | 124.9 | 126.6 | 126.4 | 127.2 | 127.6 | 126.3 | 127.4 | 127.3 | 127.5 | 128.0 | 126.6 | 126.8    |
| <b>Weights, %</b> |       | 38.3  | 19.7  | 15.7  | 6.5   | 6.3   | 3.8   | 3.4   | 3.2   | 1.1   | 1.0   |          |
| <b>RMSD, Hz</b>   |       |       |       |       |       |       |       |       |       |       |       | 2.19     |
| <b>max_d, Hz</b>  |       |       |       |       |       |       |       |       |       |       |       | 4.24     |

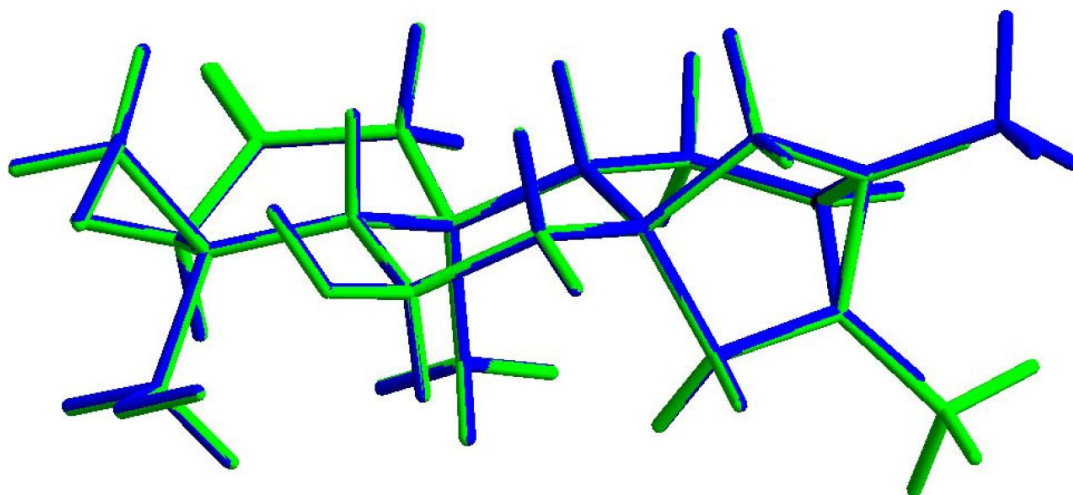

**Figure 11S.** Overlay of minimum energy conformations of **14** (blue) and **19** (green).

## References

- [1] Spartan '16, Wavefunction Inc., 18401 Von Karman Avenue, Suite 370 Irvine, CA 92612 U.S.A.
- [2] PCModel, Serena Software, Box 3076 Bloomington, IN 47402 USA
- [3] Simca-P v.10, Umetrics AB, Box 7960, S-907 19 Umeå, Sweden.
- [4] Gaussian16, Revision A.03, M. J. Frisch, G. W. Trucks, H. B. Schlegel, G. E. Scuseria, M. A. Robb, J. R. Cheeseman, G. Scalmani, V. Barone, G. A. Petersson, H. Nakatsuji, X. Li, M. Caricato, A. V. Marenich, J. Bloino, B. G. Janesko, R. Gomperts, B. Mennucci, H. P. Hratchian, J. V. Ortiz, A. F. Izmaylov, J. L. Sonnenberg, D. Williams-Young, F. Ding, F. Lipparini, F. Egidi, J. Goings, B. Peng, A. Petrone, T. Henderson, D. Ranasinghe, V. G. Zakrzewski, J. Gao, N. Rega, G. Zheng, W. Liang, M. Hada, M. Ehara, K. Toyota, R. Fukuda, J. Hasegawa, M. Ishida, T. Nakajima, Y. Honda, O. Kitao, H. Nakai, T. Vreven, K. Throssell, J. A. Montgomery, Jr., J. E. Peralta, F. Ogliaro, M. J. Bearpark, J. J. Heyd, E. N. Brothers, K. N. Kudin, V. N. Staroverov, T. A. Keith, R. Kobayashi, J. Normand, K. Raghavachari, A. P. Rendell, J. C. Burant, S. S. Iyengar, J. Tomasi, M. Cossi, J. M. Millam, M. Klene, C. Adamo, R. Cammi, J. W. Ochterski, R. L. Martin, K. Morokuma, O. Farkas, J. B. Foresman, and D. J. Fox, Gaussian, Inc., Wallingford CT, 2016.
- [5] <https://bse.pnl.gov/bse/portal>.
- [6] W. Deng, J. R. Cheeseman, M. J. Frisch, *J. Chem. Theory Comput.* **2006**, *2*, 1028.

- [7] A. G. Kutateladze, O. A. Mukhina, *J. Org. Chem.* **2015**, 80, 10838.
- [8] <https://www.chem.wisc.edu/areas/organic/index-chem.htm>.
- [9] G. Bifulco, R. Riccio, G. E. Martin, A. V. Buevich, R. T. Williamson, *Org. Lett.* **2013**, 15, 654.
